# Supplementary material for: New Quinoxaline Derivatives as Dual Pim-1/2 Kinase Inhibitors: Design, Synthesis and Biological Evaluation
Source: PubMed Central journal article supplement (PMC7914722; doi:10.3390/molecules26040867), 2021-02-06
Supplement: molecules-26-00867-s001.pdf [file molecules-26-00867-s001.pdf]

# New quinoxaline derivatives as dual Pim-1/2 kinase inhibitors: design, synthesis and biological evaluation

Bruno Oyallon <sup>1</sup>, Marie Brachet-Botineau <sup>2</sup>, Cédric Logé <sup>3</sup>, Thomas Robert <sup>4,5</sup>, Stéphane Bach <sup>4,5,6</sup>, Sajida Ibrahim <sup>7</sup>, William Raoul <sup>7,8</sup>, Cécile Croix <sup>1</sup>, Pascal Berthelot <sup>9</sup>, Jean Guillon<sup>10</sup>, Noël Pinaud <sup>11</sup>, Fabrice Gouilleux <sup>2</sup>, Marie-Claude Viaud-Massuard <sup>1</sup>, Caroline Denevault-Sabourin <sup>1,\*</sup>

- <sup>1</sup> EA GICC - ERL 7001 CNRS « Groupe Innovation et Ciblage Cellulaire », Team « Innovation Moléculaire et Thérapeutique », University of Tours, F-37200 Tours, France; [caroline.denevault@univ-tours.fr](mailto:caroline.denevault@univ-tours.fr)
- <sup>2</sup> CNRS ERL7001 LNOx « Leukemic Niche and redOx metabolism » - EA GICC, University of Tours, F-37000 Tours, France; [fabrice.gouilleux@univ-tours.fr](mailto:fabrice.gouilleux@univ-tours.fr)
- <sup>3</sup> Université de Nantes, Nantes Atlantique Universités, Département de Chimie Thérapeutique, Cibles et Médicaments des Infections et du Cancer, IICIMED- EA1155, Institut de Recherche en Santé 2, F-44200 Nantes, France; [cedric.loge@univ-nantes.fr](mailto:cedric.loge@univ-nantes.fr)
- <sup>4</sup> Sorbonne Université, CNRS, UMR8227, Integrative Biology of Marine Models Laboratory (LBI2M), Station Biologique de Roscoff, F-29680 Roscoff, France; [bach@sb-roscoff.fr](mailto:bach@sb-roscoff.fr)
- <sup>5</sup> Sorbonne Université, CNRS, FR2424, Plateforme de criblage KISSf (Kinase Inhibitor Specialized Screening facility), Station Biologique de Roscoff, F-29680 Roscoff Cedex, France; [trobert@sb-roscoff.fr](mailto:trobert@sb-roscoff.fr)
- <sup>6</sup> Centre of Excellence for Pharmaceutical Sciences, North-West University, Private Bag X6001, Potchefstroom 2520, South Africa
- <sup>7</sup> EA GICC - ERL 7001 CNRS « Groupe Innovation et Ciblage Cellulaire », Team « Pharmacologie des Anticorps Thérapeutiques Chez l'Homme », University of Tours, F-37200 Tours, France; [william.raoul@univ-tours.fr](mailto:william.raoul@univ-tours.fr)
- <sup>8</sup> N2C UMR 1069, University of Tours, Inserm, F-37032 Tours, France
- <sup>9</sup> UMR-S 1172 - JPArc - Centre de Recherche Jean-Pierre AUBERT Neurosciences et Cancer, University of Lille, Inserm, CHU Lille, F-59000 Lille, France
- <sup>10</sup> University of Bordeaux, INSERM U12132 - UMR CNRS 5320, ARNA Laboratory, F-33076 Bordeaux, France; [jean.guillon@u-bordeaux.fr](mailto:jean.guillon@u-bordeaux.fr)
- <sup>11</sup> University of Bordeaux, ISM – CNRS UMR 5255, F-33405 Talence, France; [noel.pinaud@u-bordeaux.fr](mailto:noel.pinaud@u-bordeaux.fr)

\* Correspondence: [caroline.denevault@univ-tours.fr](mailto:caroline.denevault@univ-tours.fr); Tel.: +33 2 47-36-72-31 (C.D.S.)

|                                                    |    |
|----------------------------------------------------|----|
| 1. NMR spectra.....                                | 2  |
| 2. Mammalian protein kinase assays.....            | 22 |
| 2.1. Inhibition curves of compound <b>5c</b> ..... | 22 |
| 2.2. Inhibition curves of compound <b>5e</b> ..... | 23 |

# 1. NMR spectra

## <sup>1</sup>H NMR of compound 5a

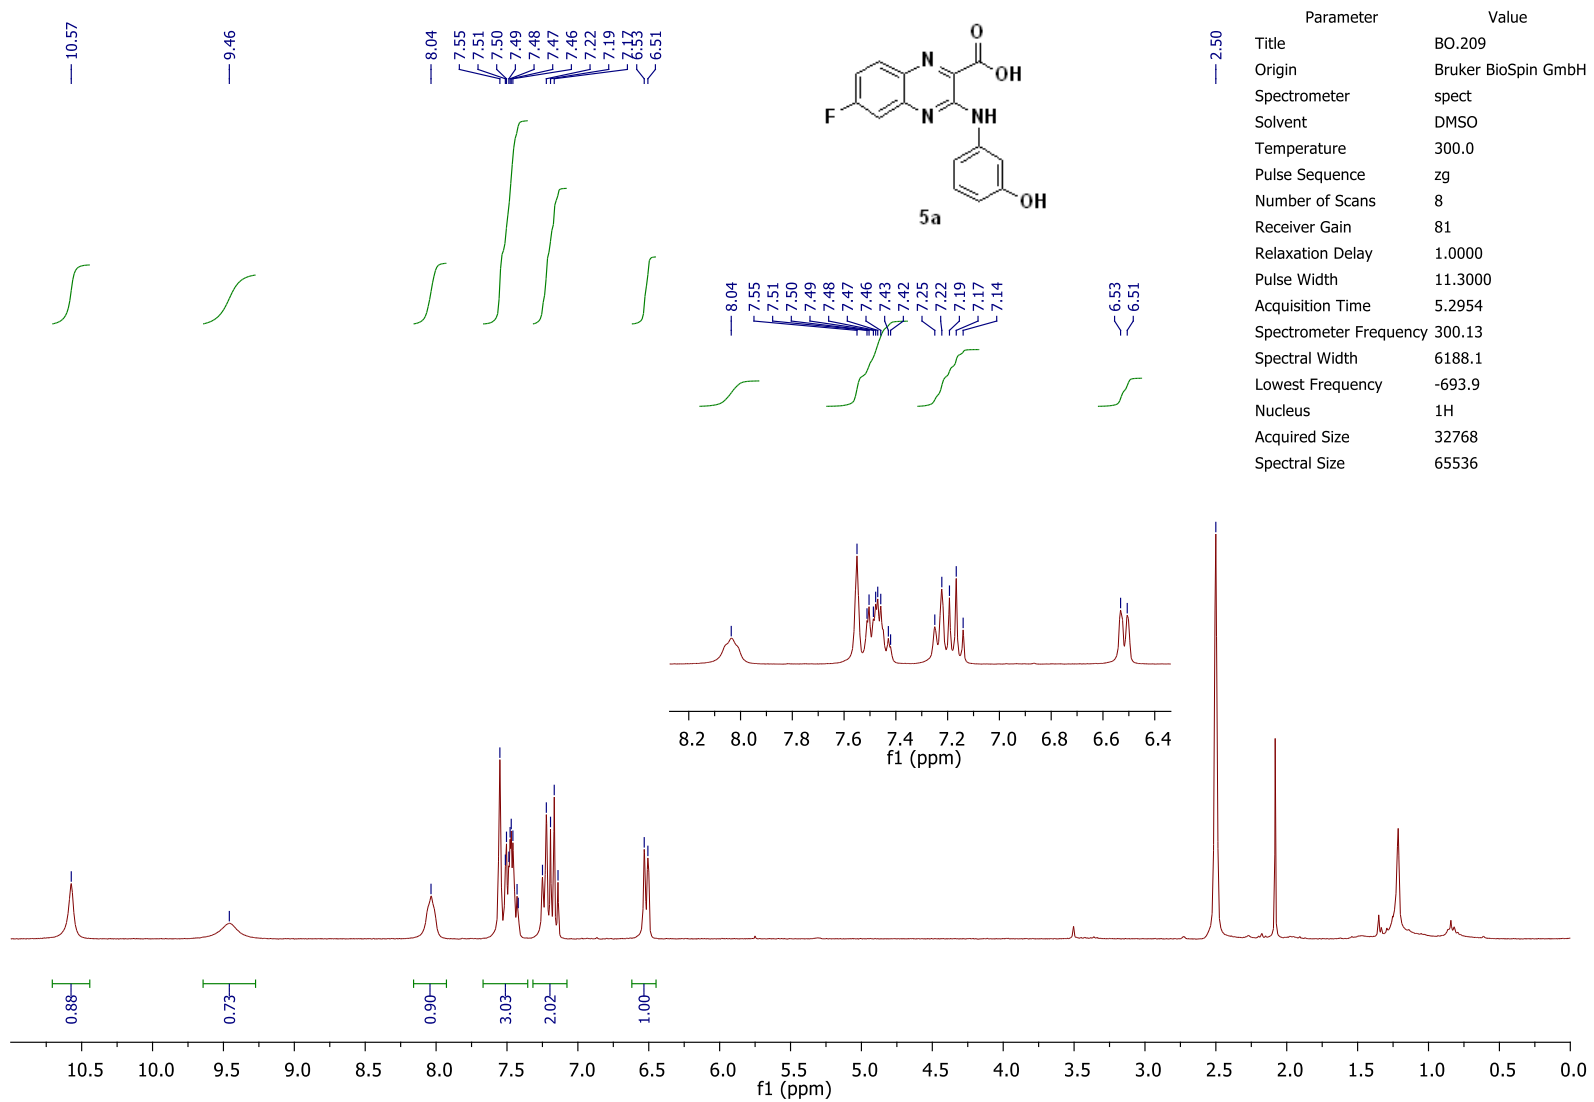

# <sup>13</sup>C NMR of compound 5a

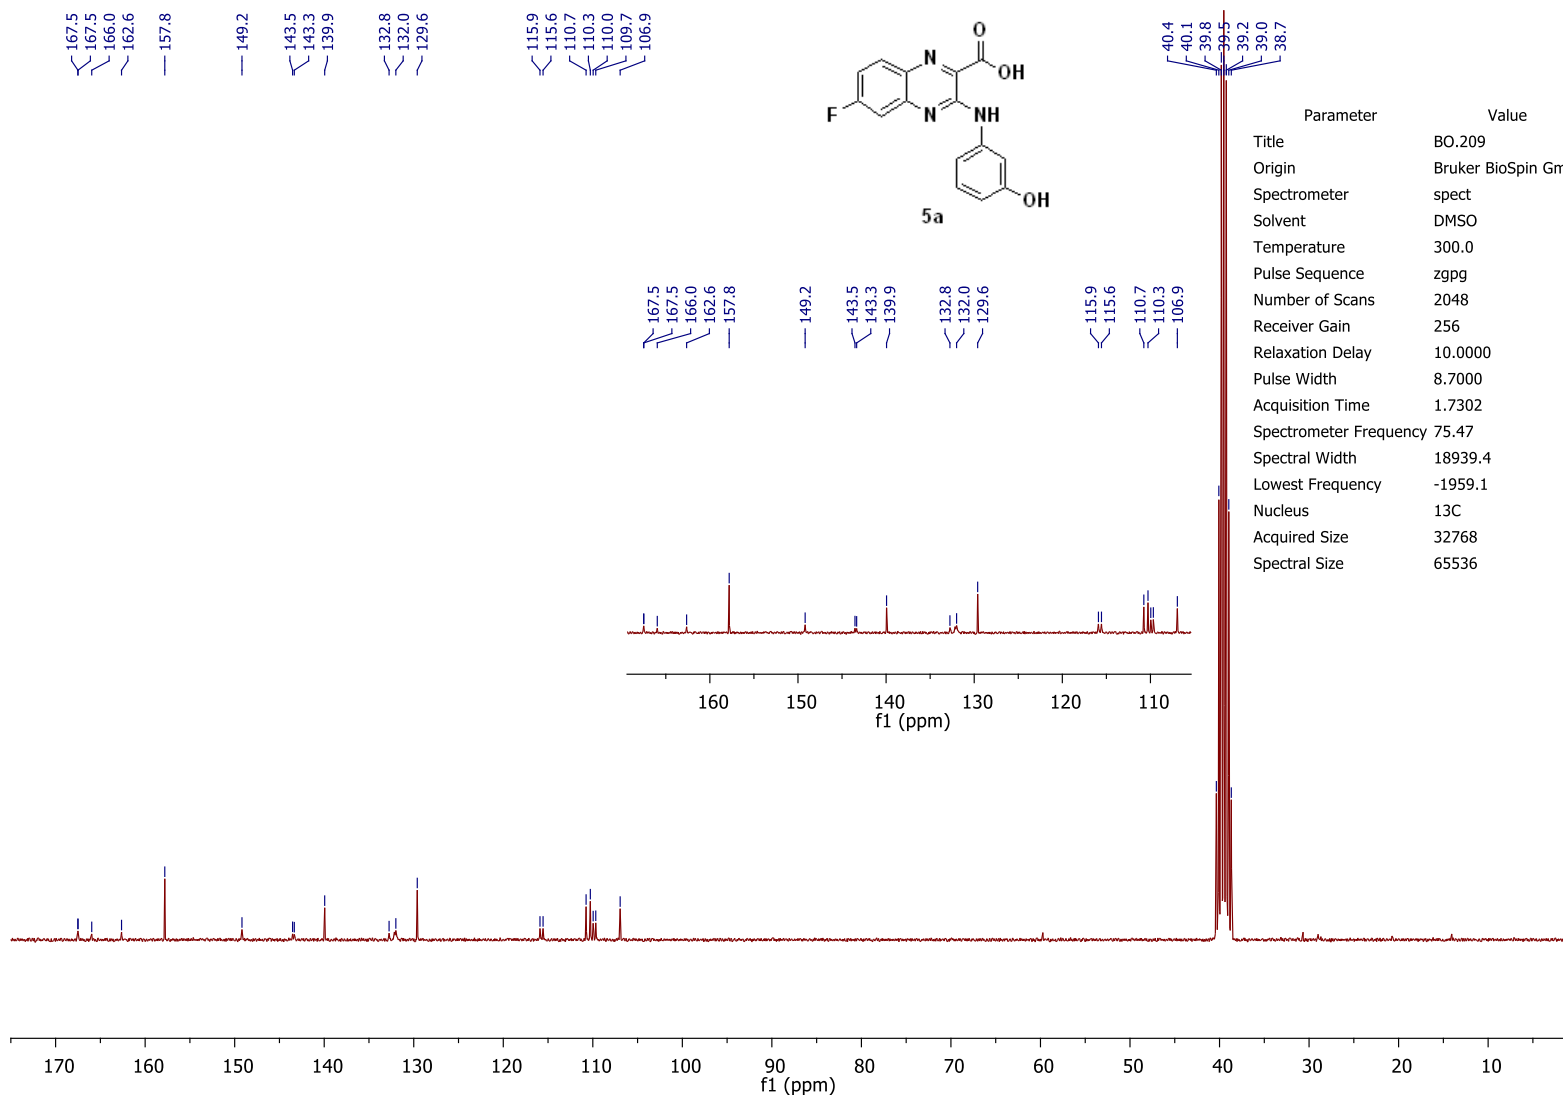

# <sup>19</sup>F NMR of compound **5a**

-105.6

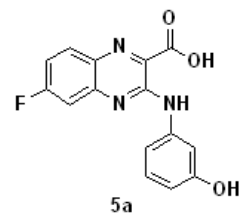

| Parameter              | Value               |
|------------------------|---------------------|
| Title                  | BO.209              |
| Origin                 | Bruker BioSpin GmbH |
| Spectrometer           | spect               |
| Solvent                | DMSO                |
| Temperature            | 300.0               |
| Pulse Sequence         | zgfhgqn             |
| Number of Scans        | 16                  |
| Receiver Gain          | 2050                |
| Relaxation Delay       | 1.0000              |
| Pulse Width            | 8.6000              |
| Acquisition Time       | 0.5768              |
| Spectrometer Frequency | 282.40              |
| Spectral Width         | 113636.4            |
| Lowest Frequency       | -85058.4            |
| Nucleus                | 19F                 |
| Acquired Size          | 65536               |
| Spectral Size          | 131072              |

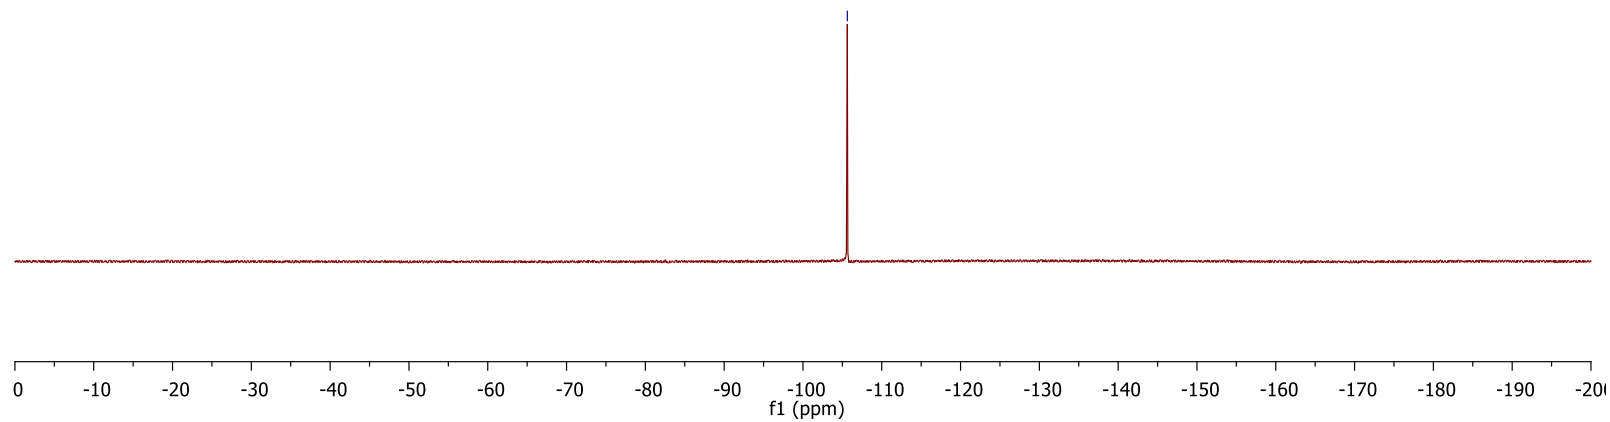

# <sup>1</sup>H NMR of compound 5b

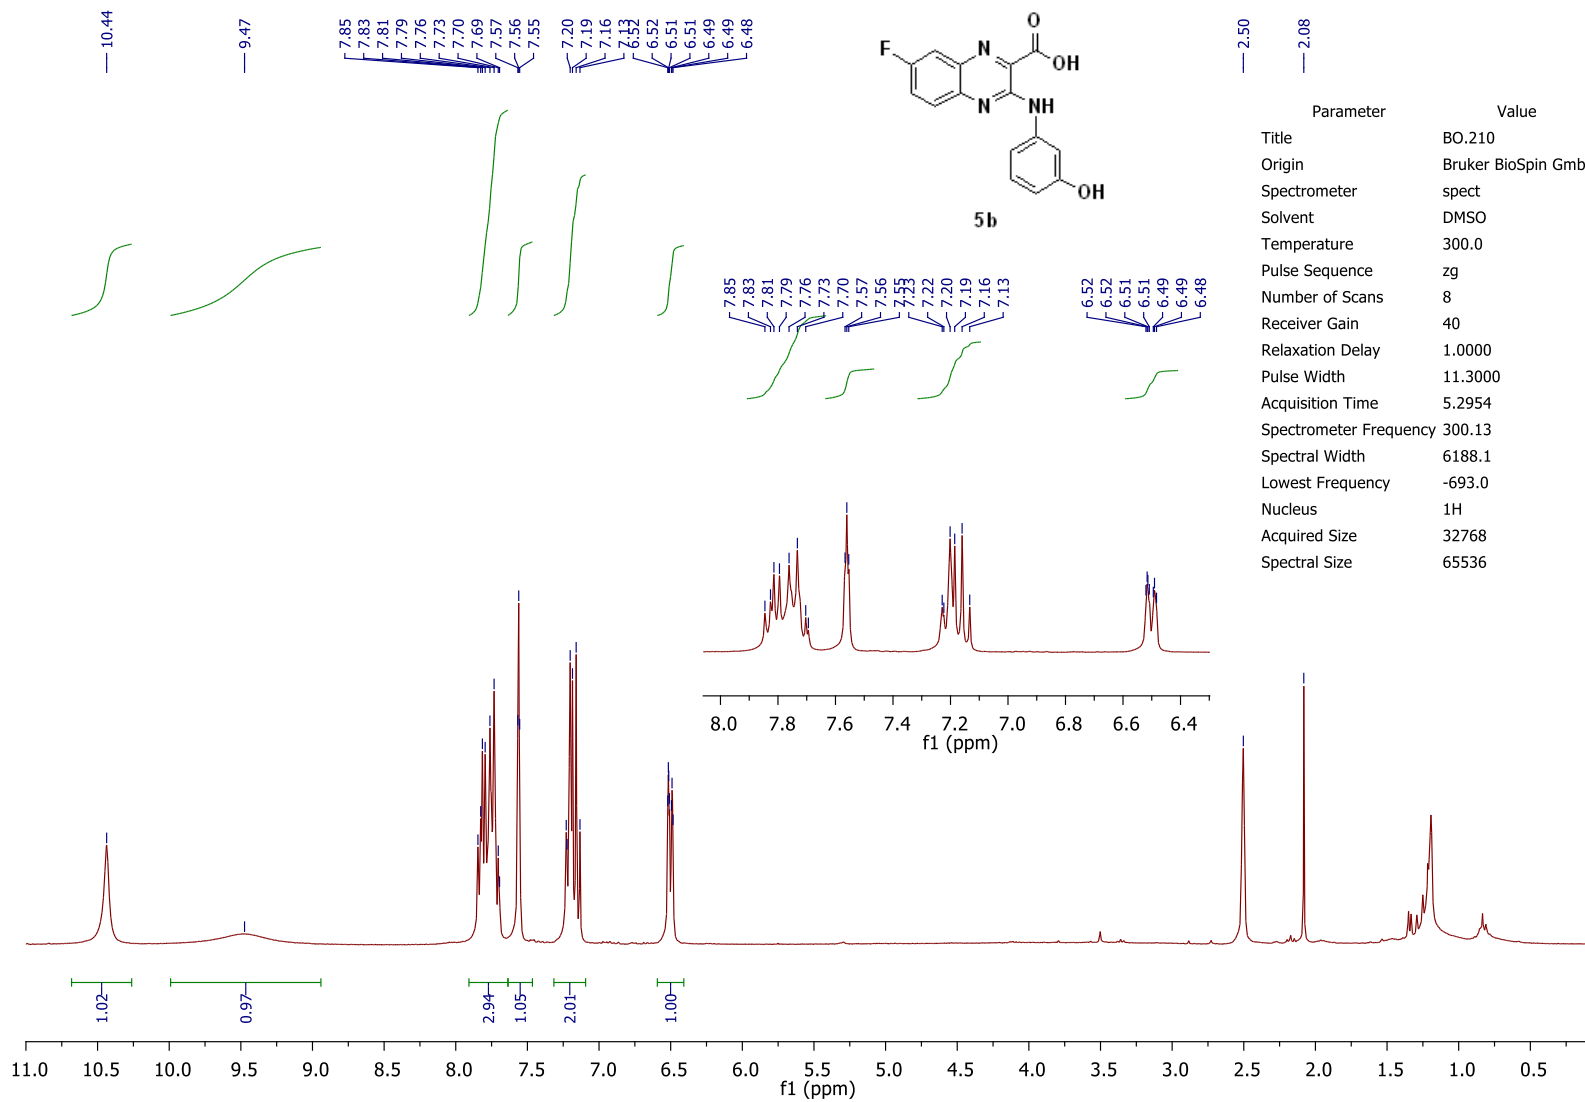

# <sup>13</sup>C NMR of compound **5b**

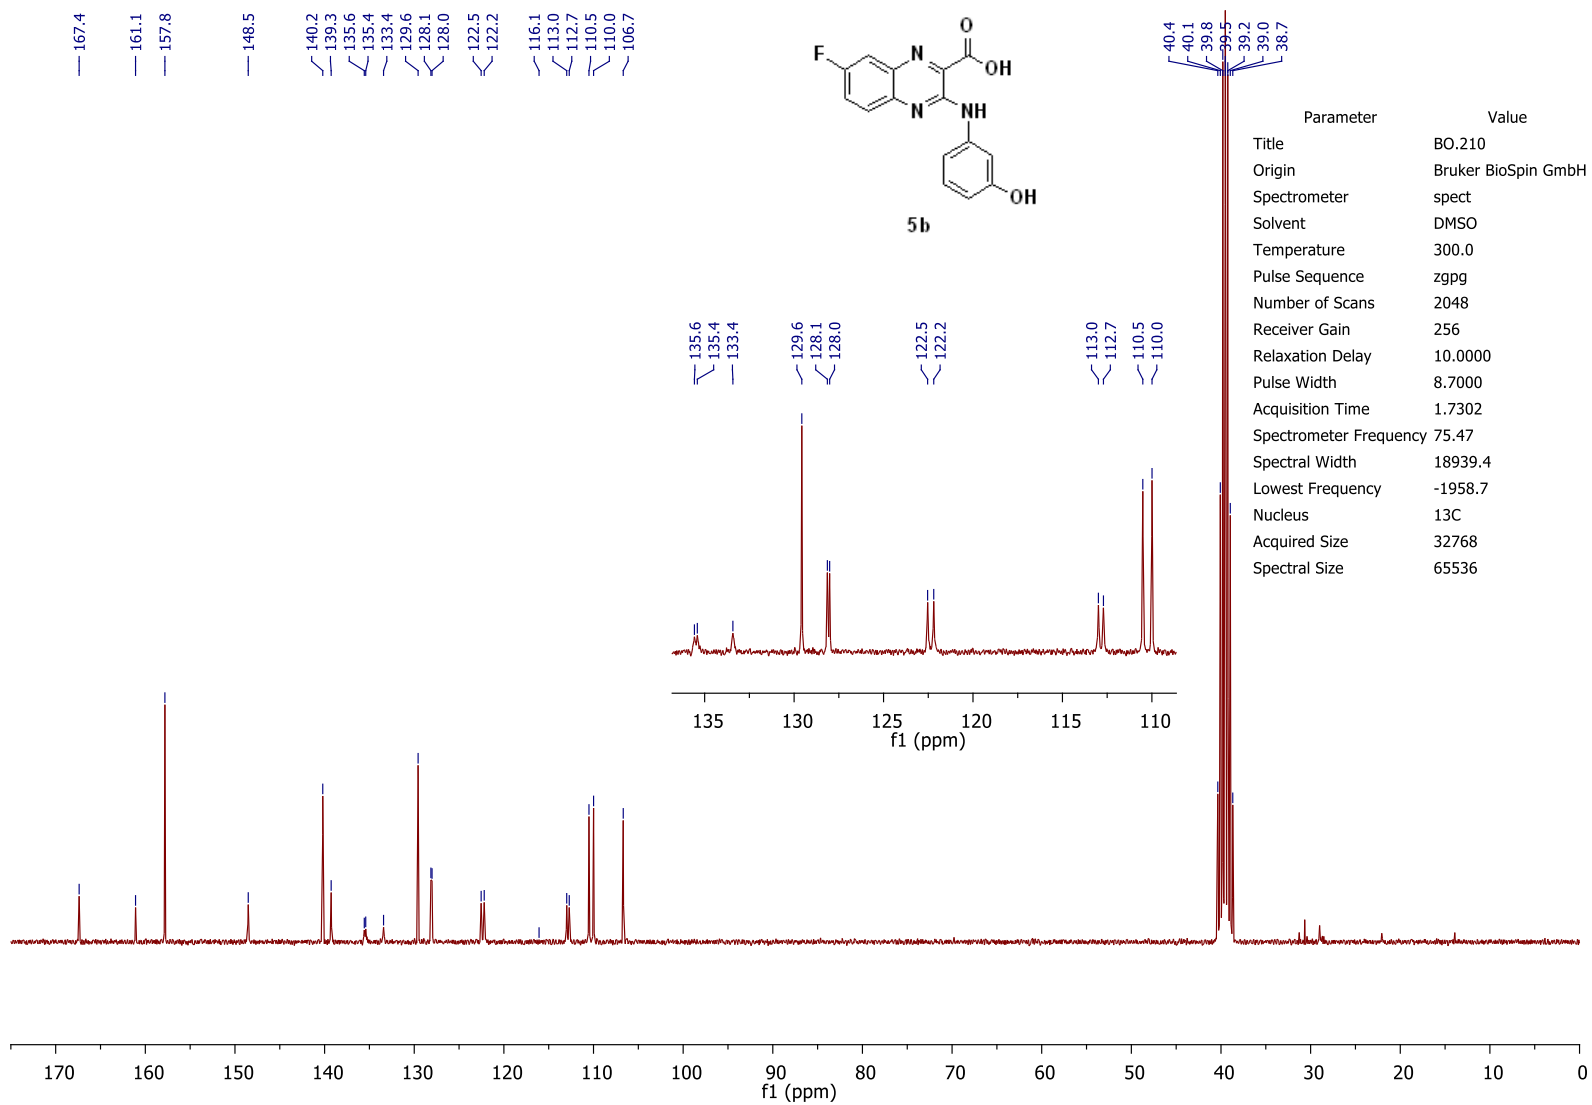

# <sup>19</sup>F NMR of compound **5b**

-114.7

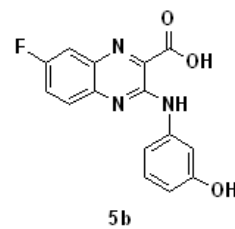

| Parameter              | Value               |
|------------------------|---------------------|
| Title                  | BO.210              |
| Origin                 | Bruker BioSpin GmbH |
| Spectrometer           | spect               |
| Solvent                | DMSO                |
| Temperature            | 300.0               |
| Pulse Sequence         | zgfhgqn             |
| Number of Scans        | 16                  |
| Receiver Gain          | 2050                |
| Relaxation Delay       | 1.0000              |
| Pulse Width            | 8.6000              |
| Acquisition Time       | 0.5768              |
| Spectrometer Frequency | 282.40              |
| Spectral Width         | 113636.4            |
| Lowest Frequency       | -85058.4            |
| Nucleus                | <sup>19</sup> F     |
| Acquired Size          | 65536               |
| Spectral Size          | 131072              |

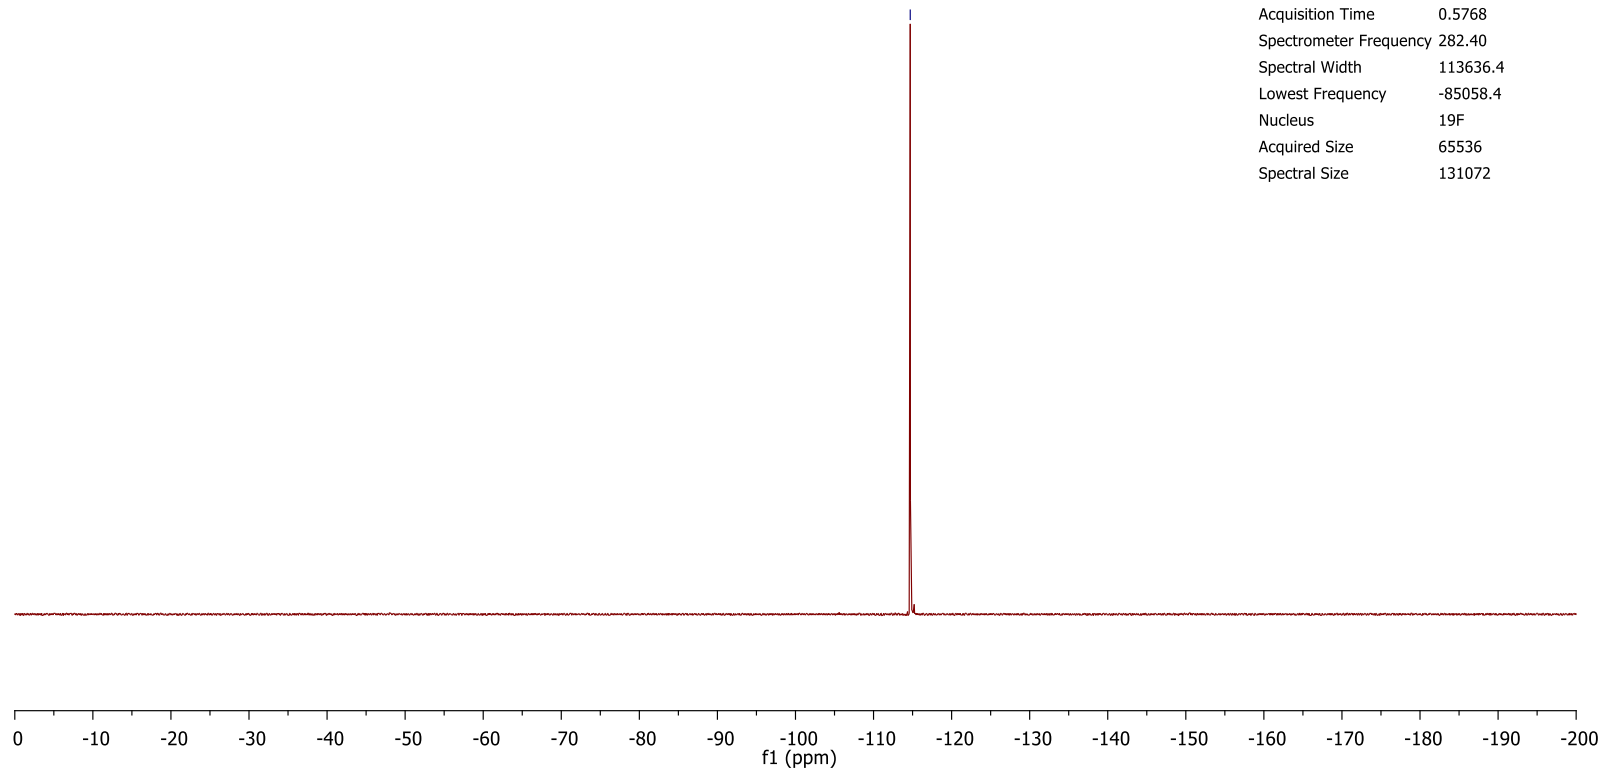

# <sup>1</sup>H NMR of compound 5c

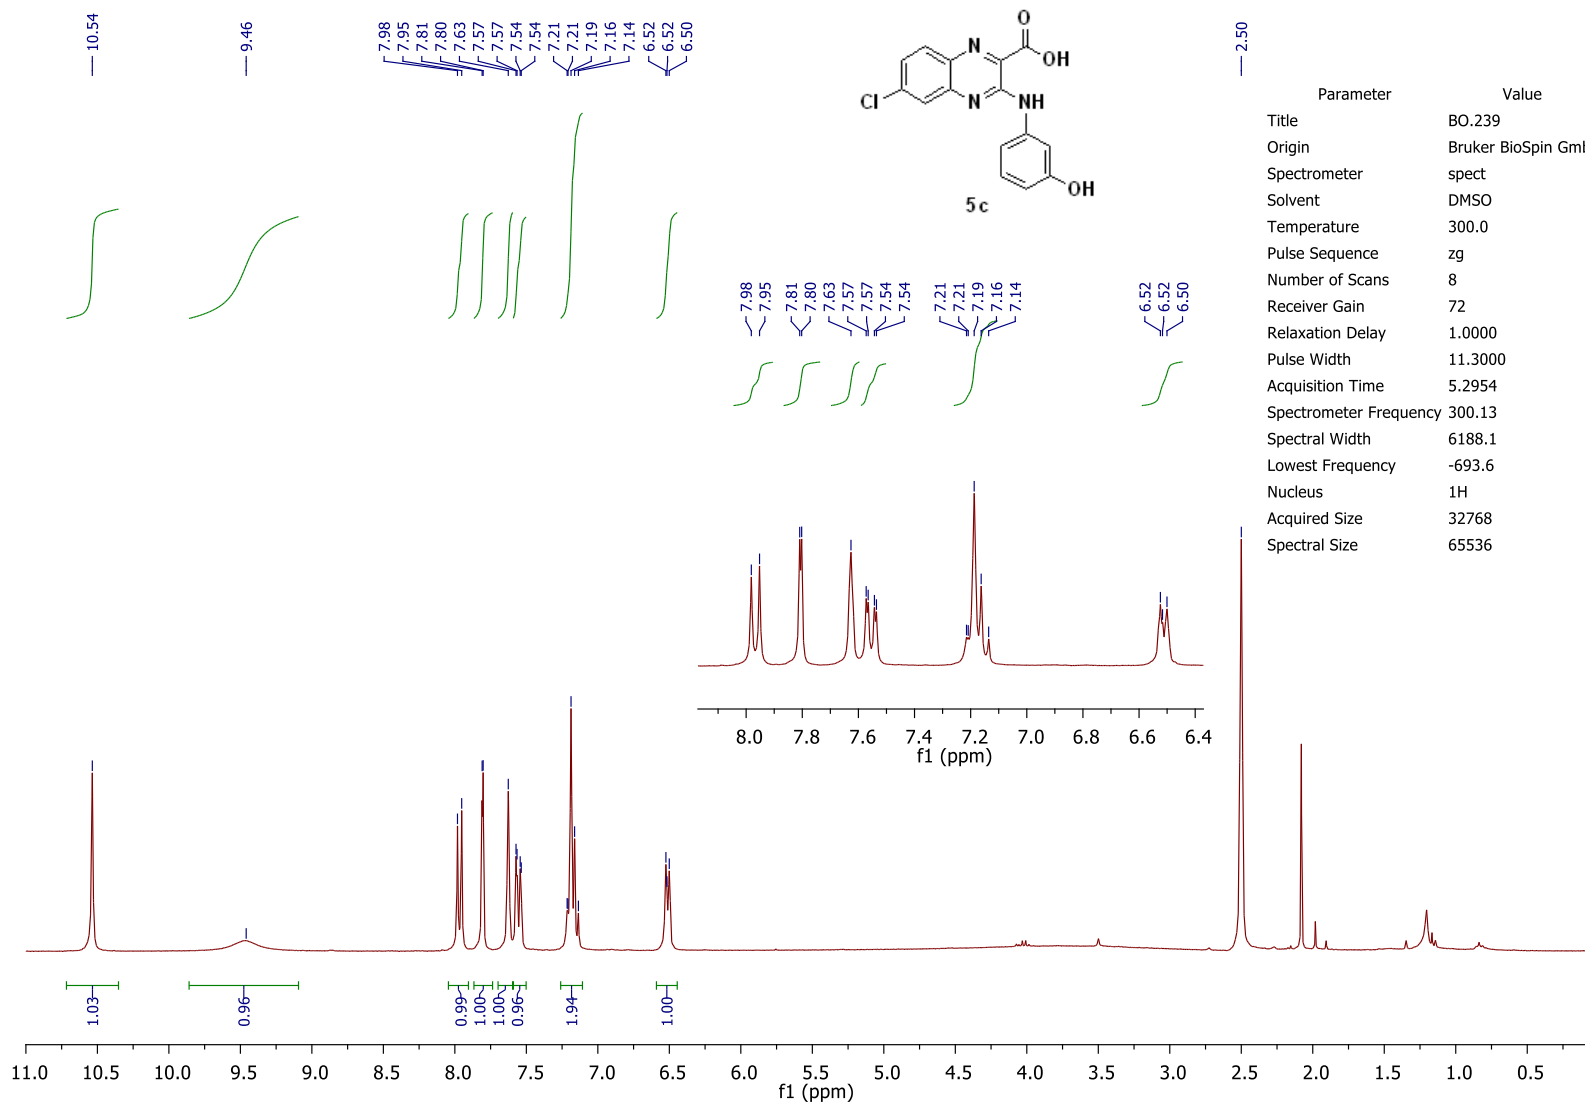

| Parameter              | Value               |
|------------------------|---------------------|
| Title                  | BO.239              |
| Origin                 | Bruker BioSpin GmbH |
| Spectrometer           | spect               |
| Solvent                | DMSO                |
| Temperature            | 300.0               |
| Pulse Sequence         | zg                  |
| Number of Scans        | 8                   |
| Receiver Gain          | 72                  |
| Relaxation Delay       | 1.0000              |
| Pulse Width            | 11.3000             |
| Acquisition Time       | 5.2954              |
| Spectrometer Frequency | 300.13              |
| Spectral Width         | 6188.1              |
| Lowest Frequency       | -693.6              |
| Nucleus                | <sup>1</sup> H      |
| Acquired Size          | 32768               |
| Spectral Size          | 65536               |



# <sup>13</sup>C NMR of compound 5c

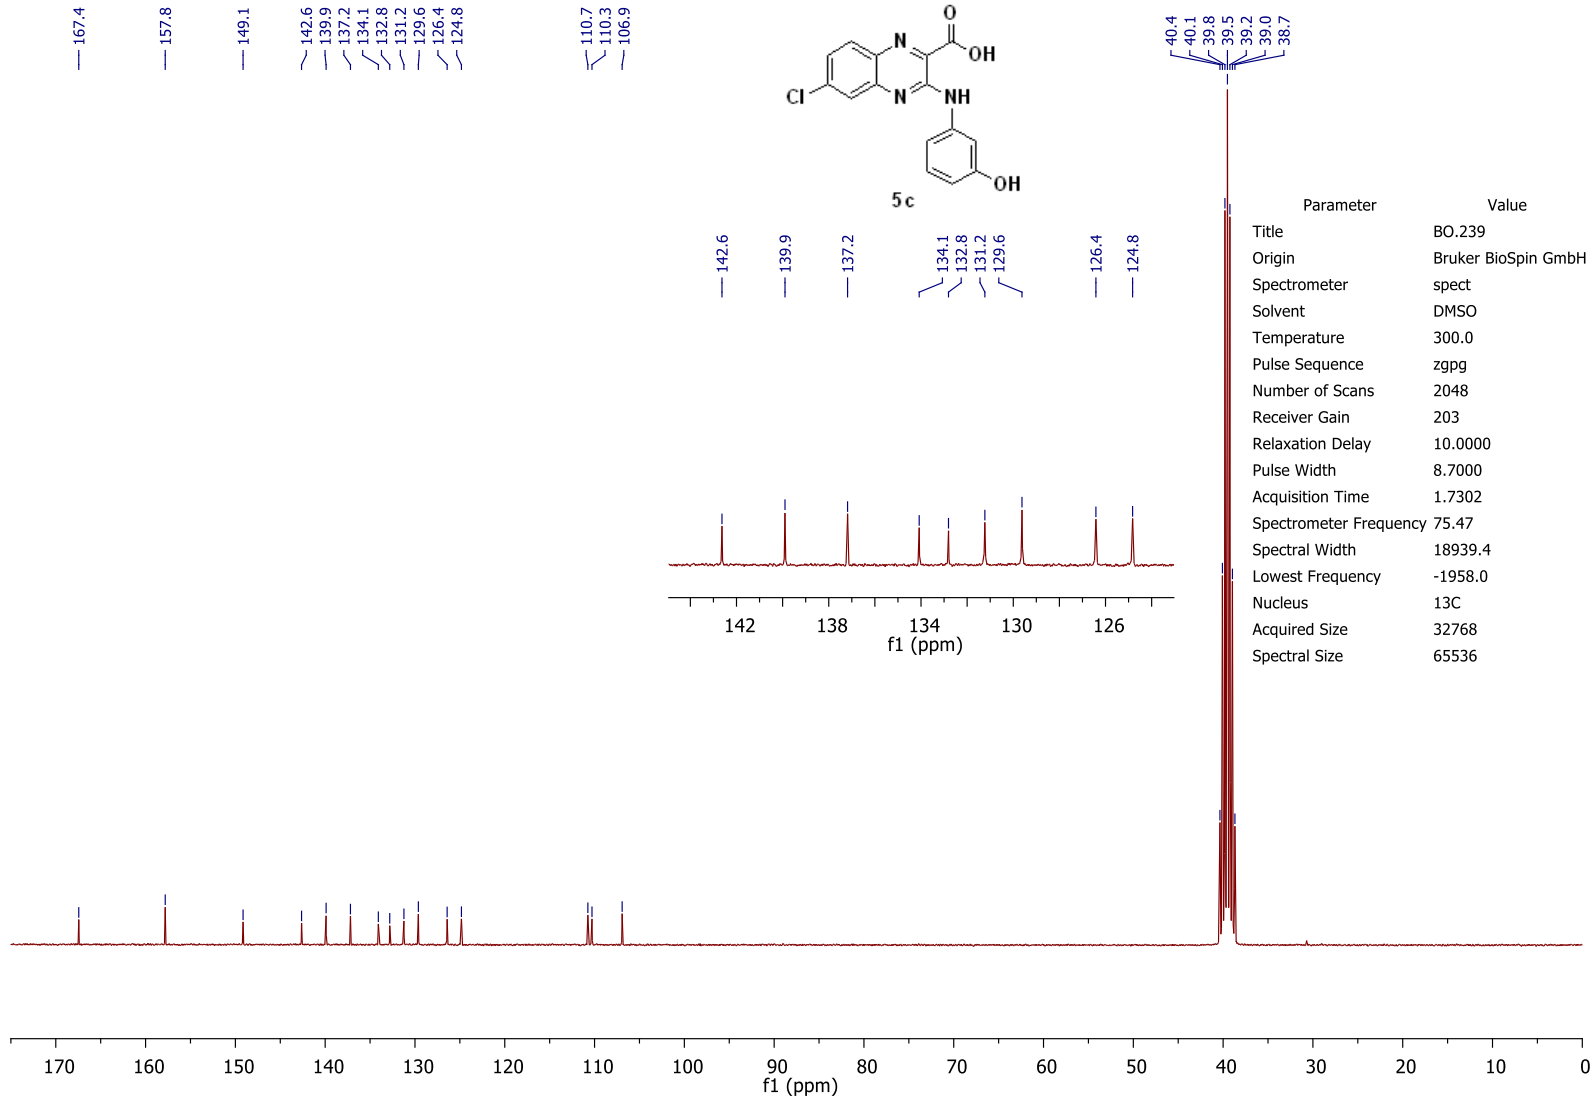

# <sup>1</sup>H NMR of compound 5d

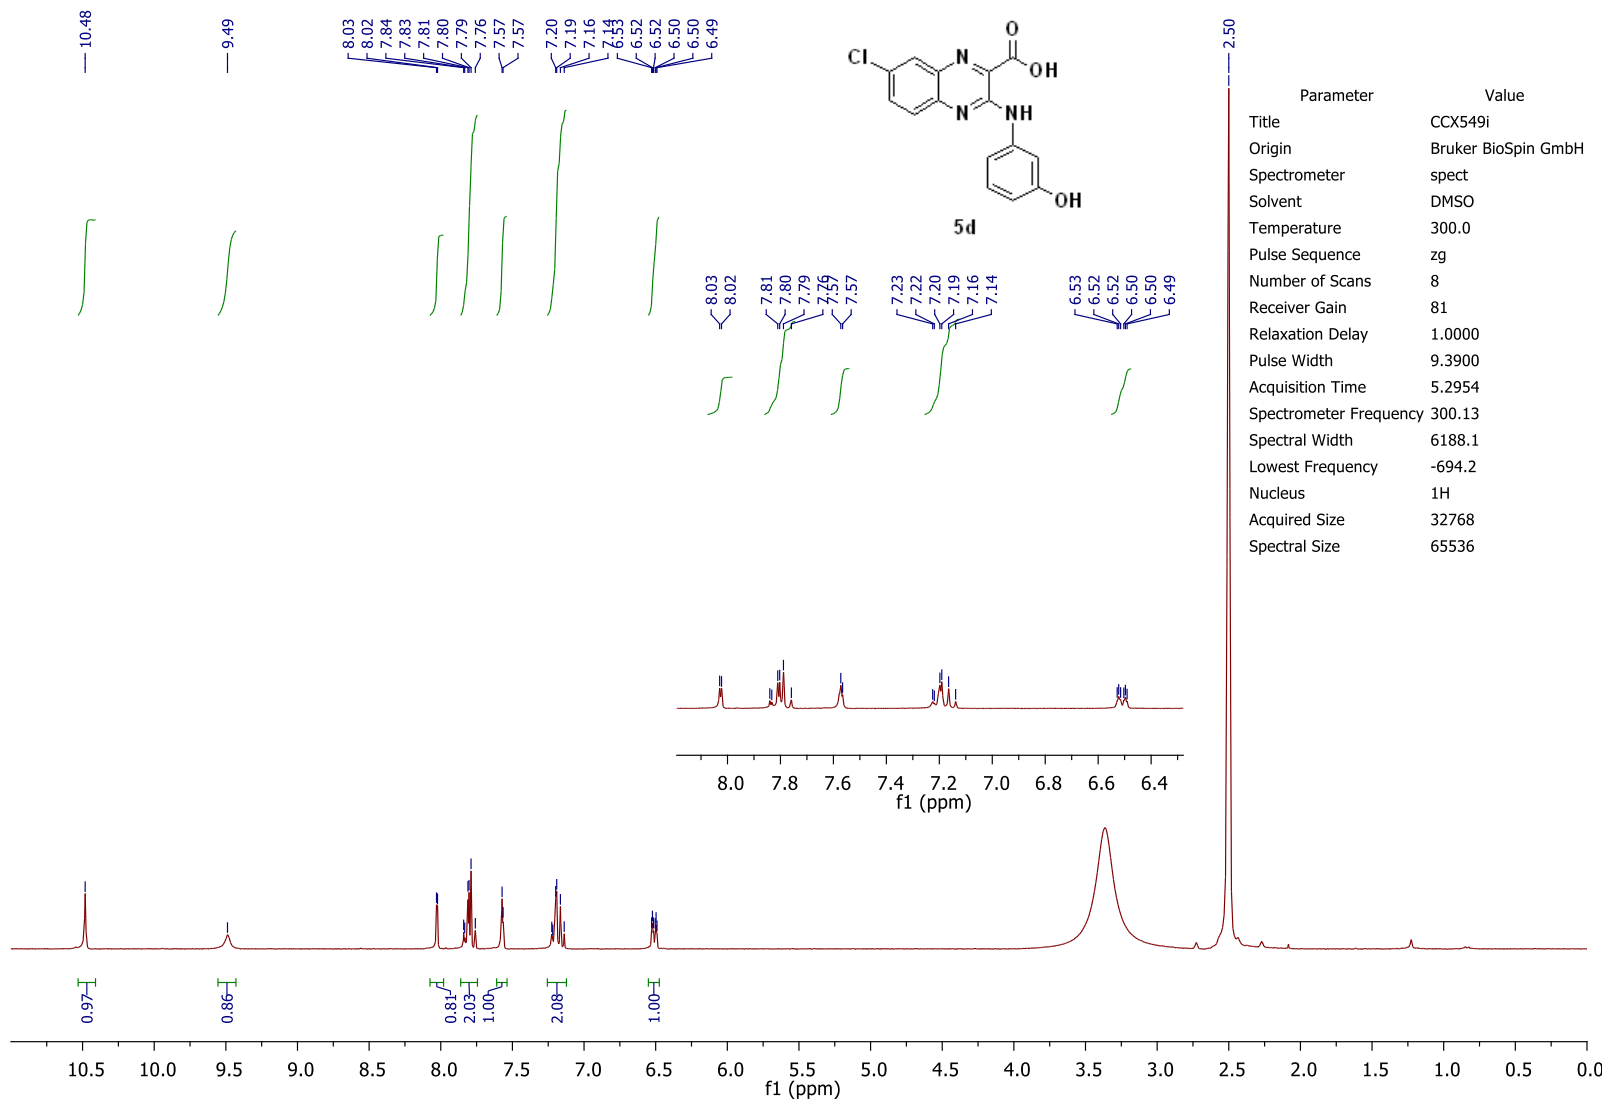

| Parameter              | Value               |
|------------------------|---------------------|
| Title                  | CCX549i             |
| Origin                 | Bruker BioSpin GmbH |
| Spectrometer           | spect               |
| Solvent                | DMSO                |
| Temperature            | 300.0               |
| Pulse Sequence         | zg                  |
| Number of Scans        | 8                   |
| Receiver Gain          | 81                  |
| Relaxation Delay       | 1.0000              |
| Pulse Width            | 9.3900              |
| Acquisition Time       | 5.2954              |
| Spectrometer Frequency | 300.13              |
| Spectral Width         | 6188.1              |
| Lowest Frequency       | -694.2              |
| Nucleus                | <sup>1</sup> H      |
| Acquired Size          | 32768               |
| Spectral Size          | 65536               |

# <sup>13</sup>C NMR of compound 5d

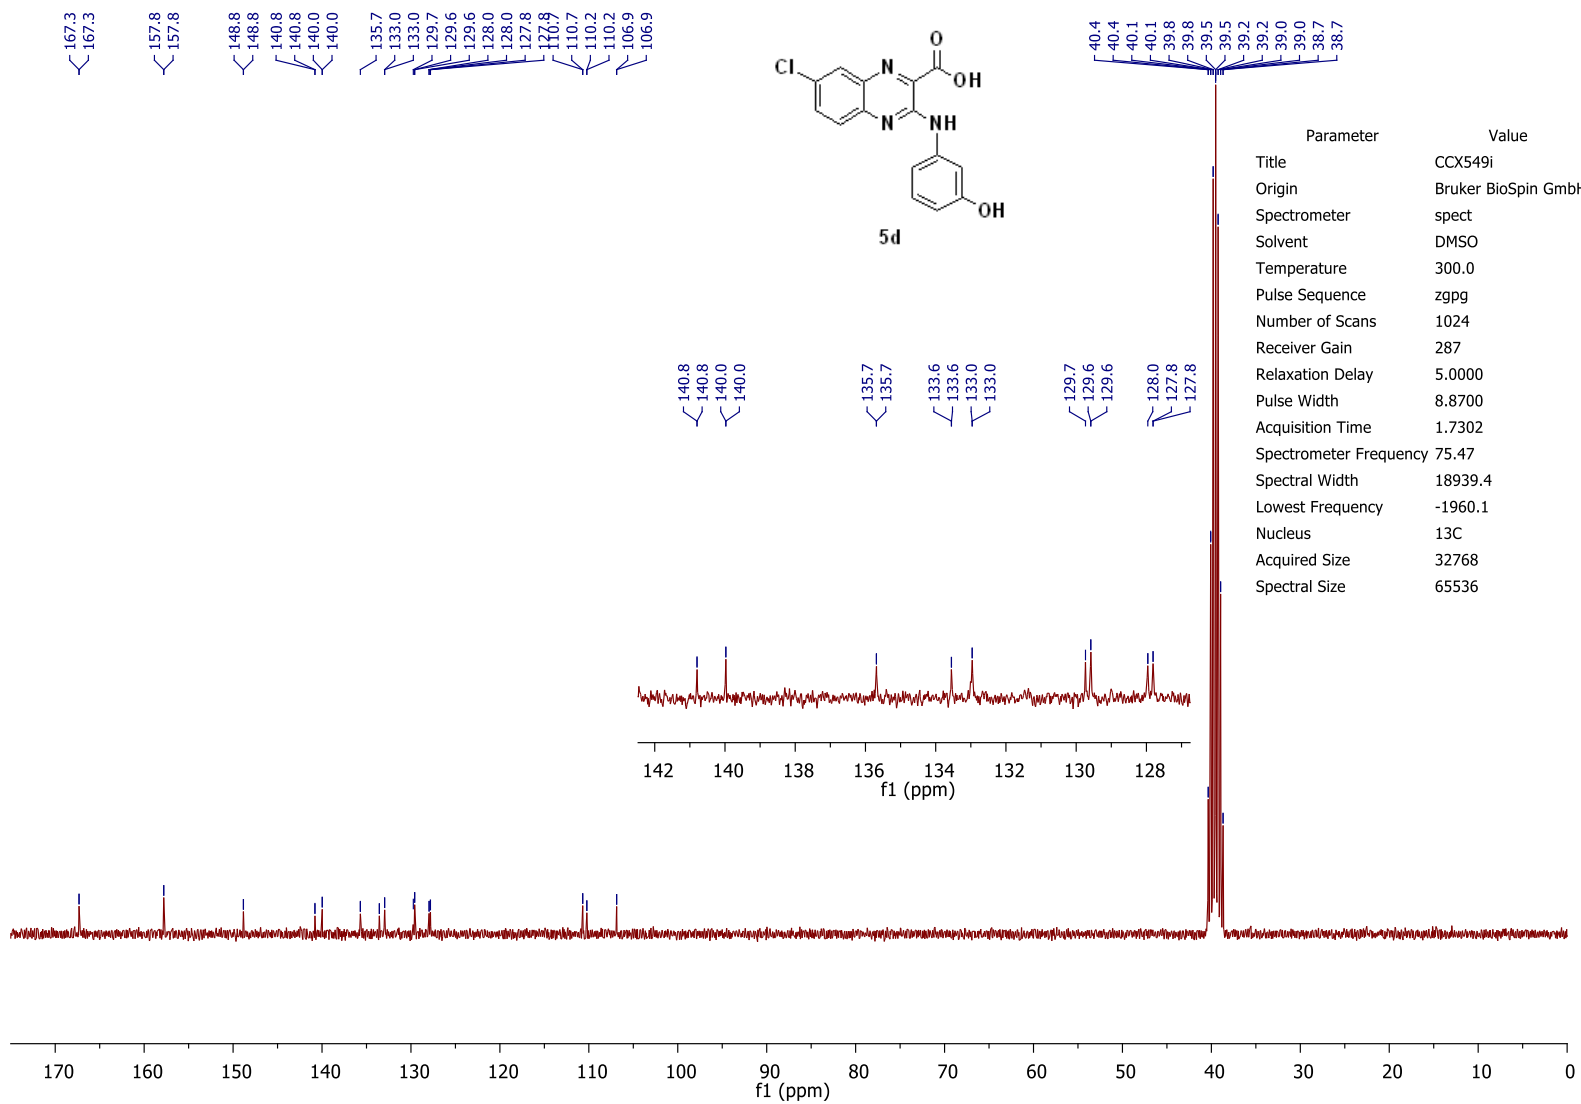

# <sup>1</sup>H NMR of compound 5e

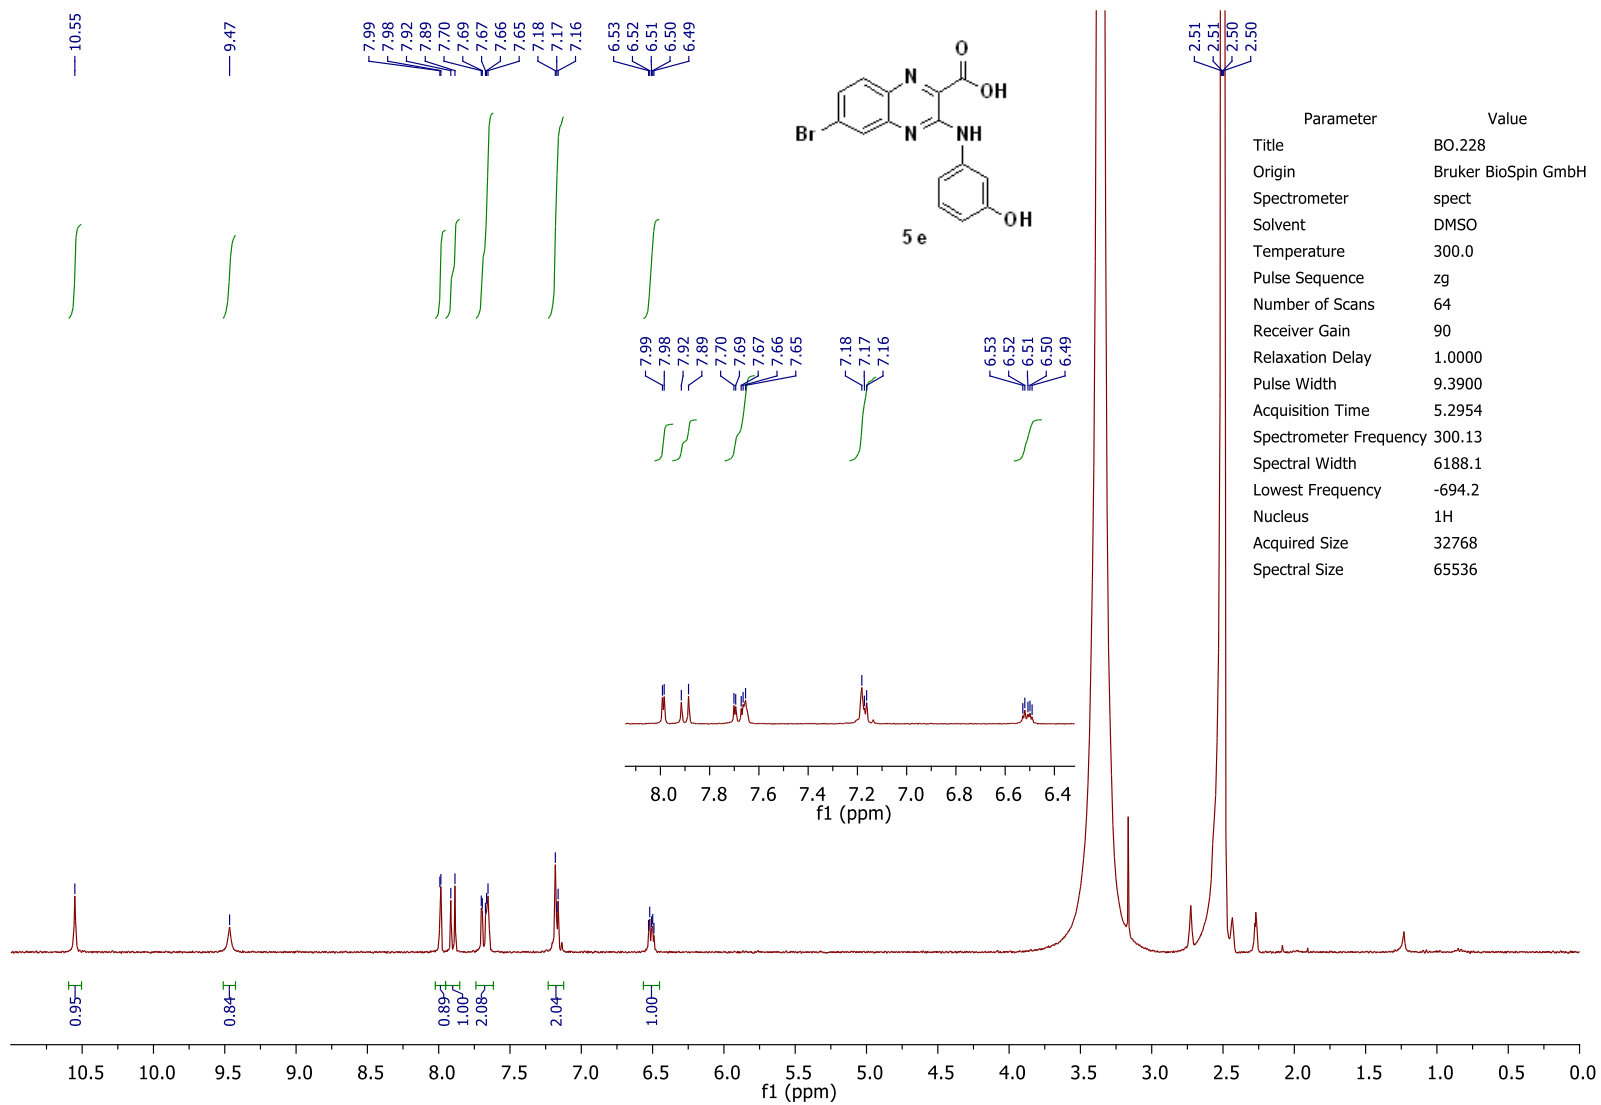

| Parameter              | Value               |
|------------------------|---------------------|
| Title                  | BO.228              |
| Origin                 | Bruker BioSpin GmbH |
| Spectrometer           | spect               |
| Solvent                | DMSO                |
| Temperature            | 300.0               |
| Pulse Sequence         | zg                  |
| Number of Scans        | 64                  |
| Receiver Gain          | 90                  |
| Relaxation Delay       | 1.0000              |
| Pulse Width            | 9.3900              |
| Acquisition Time       | 5.2954              |
| Spectrometer Frequency | 300.13              |
| Spectral Width         | 6188.1              |
| Lowest Frequency       | -694.2              |
| Nucleus                | 1H                  |
| Acquired Size          | 32768               |
| Spectral Size          | 65536               |

# <sup>13</sup>C NMR of compound 5e

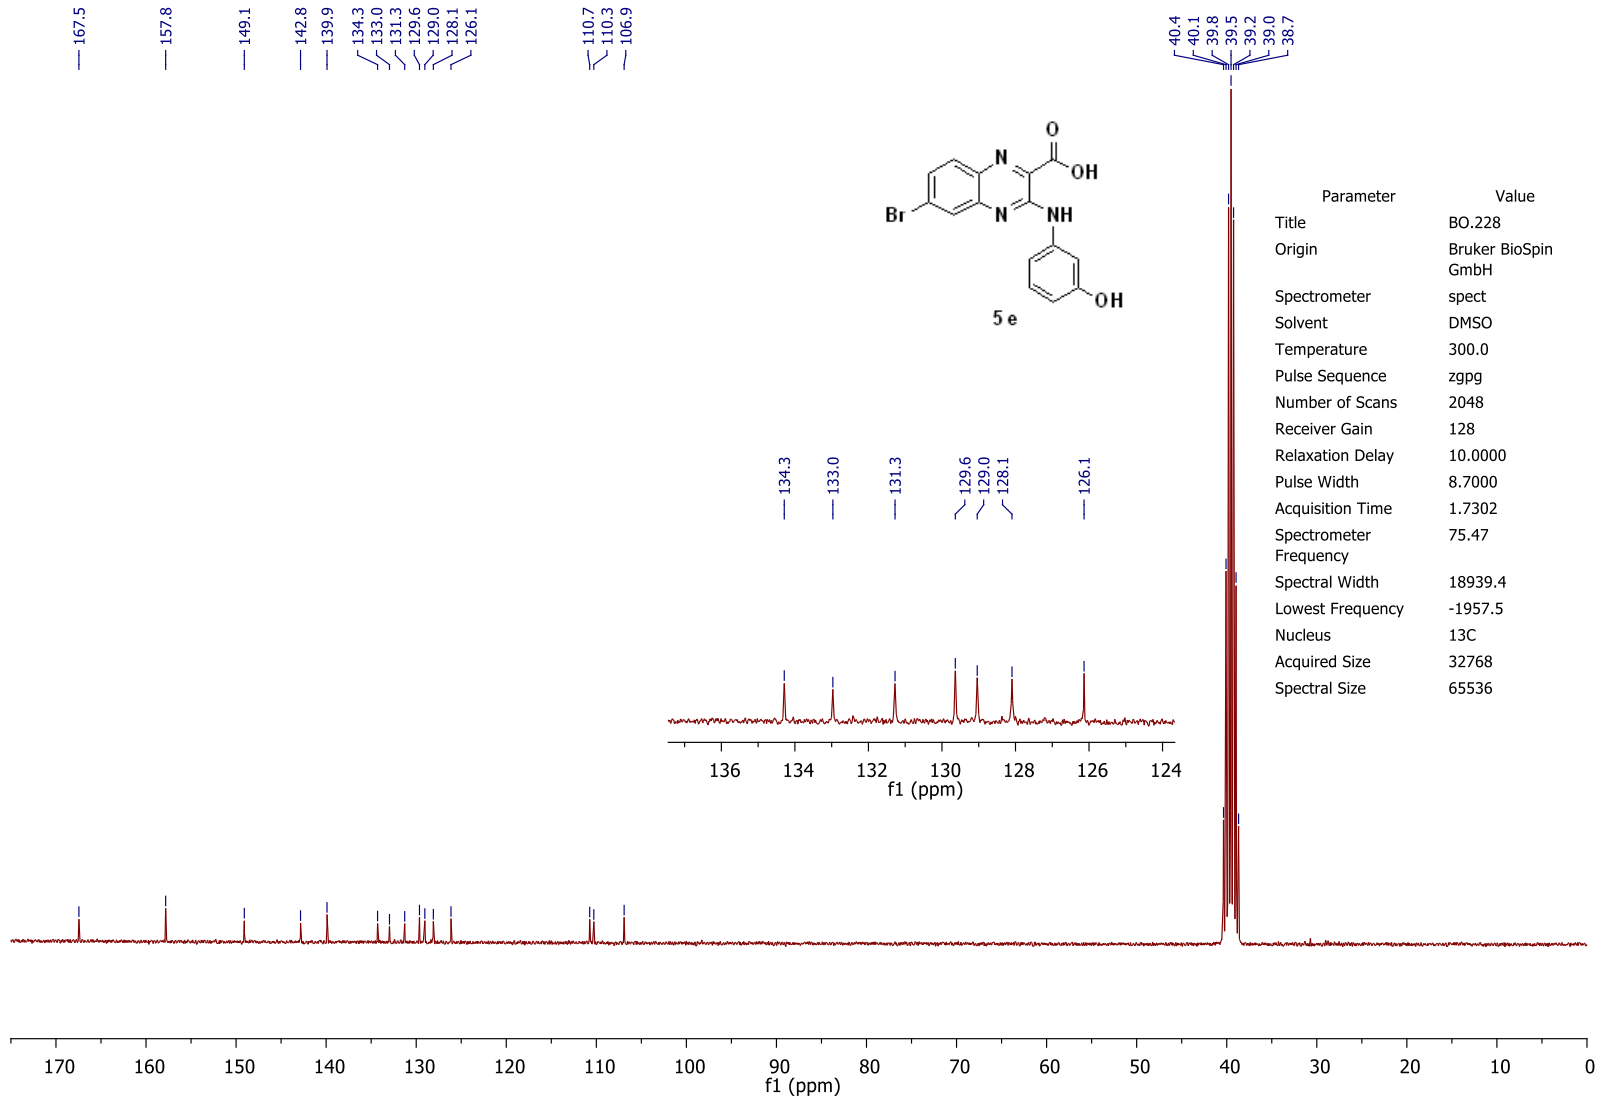

# <sup>1</sup>H NMR of compound 5f

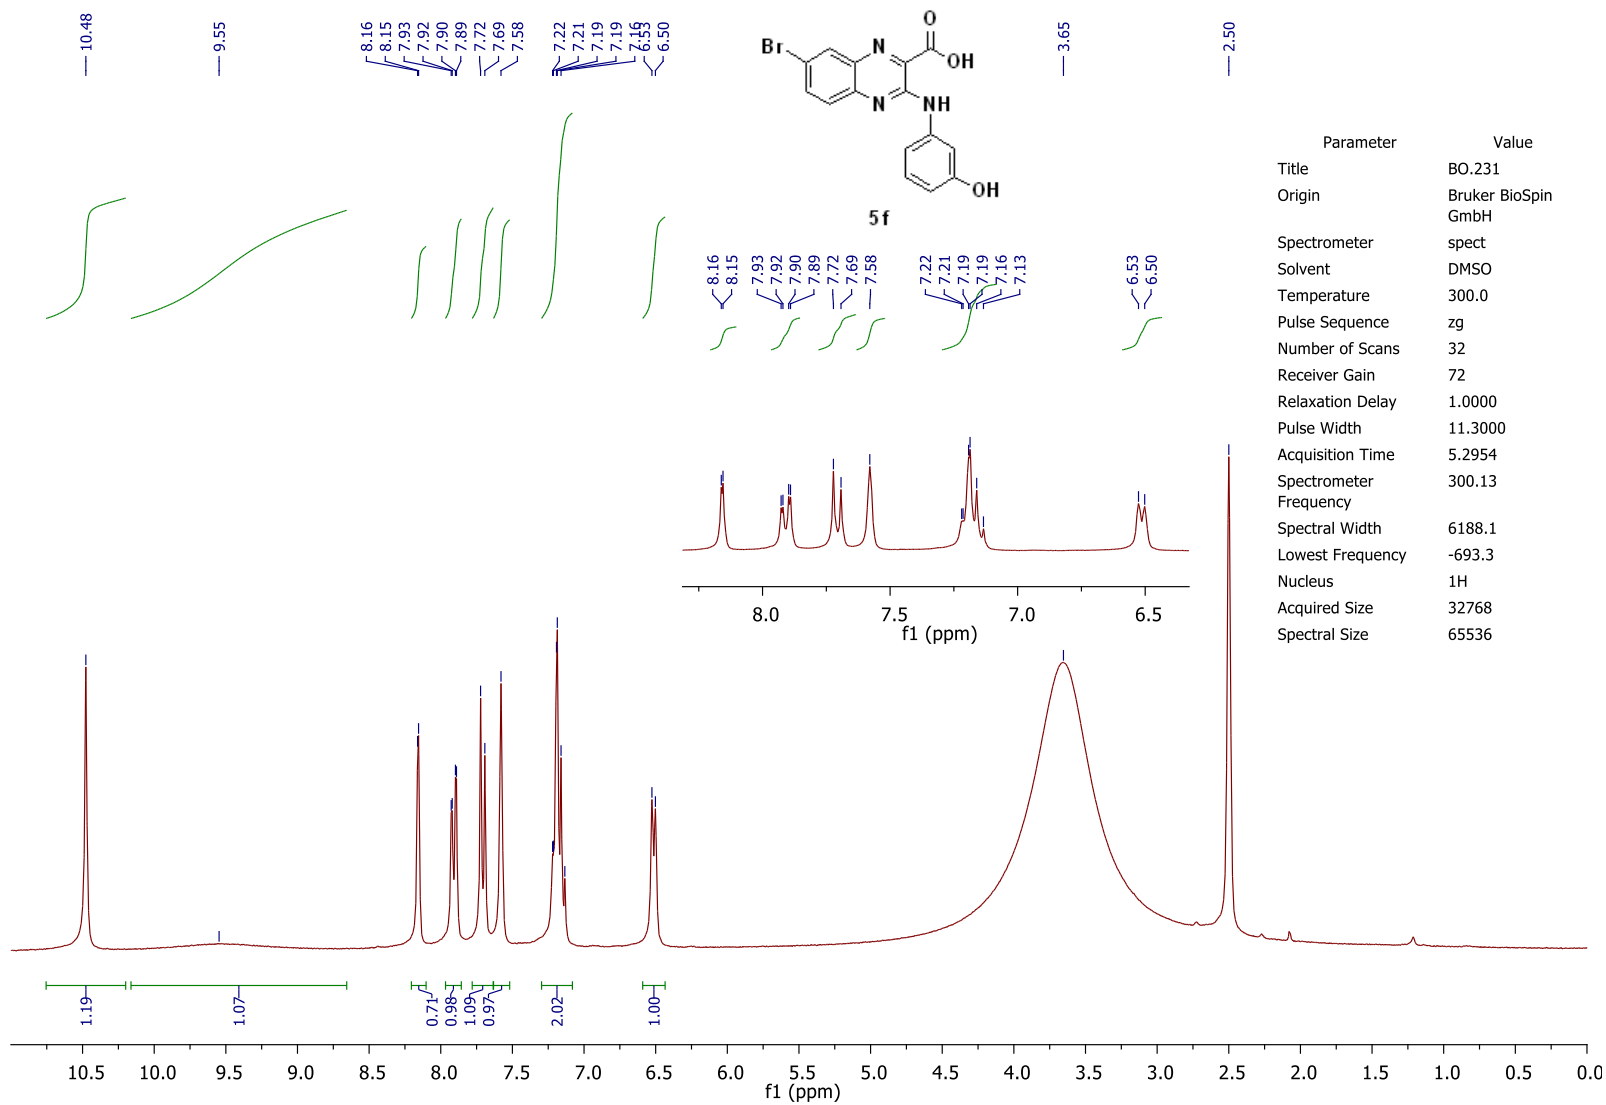

# <sup>13</sup>C NMR of compound 5f

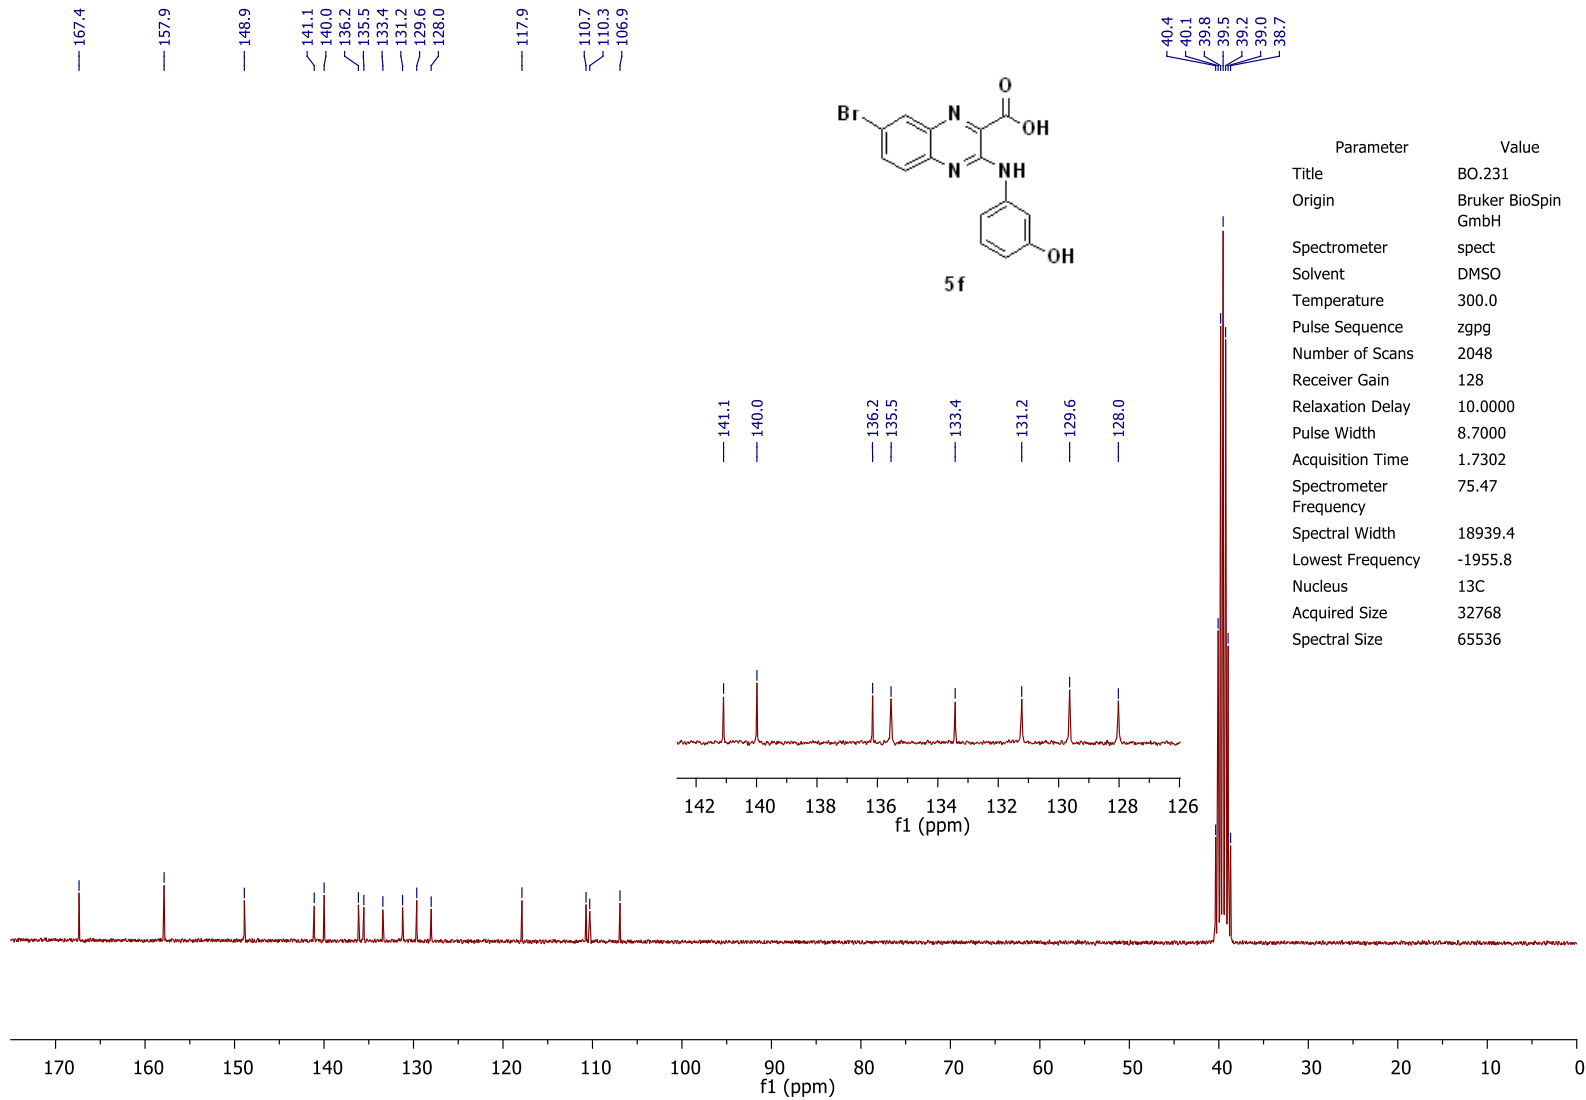

# <sup>1</sup>H NMR of compound 5g

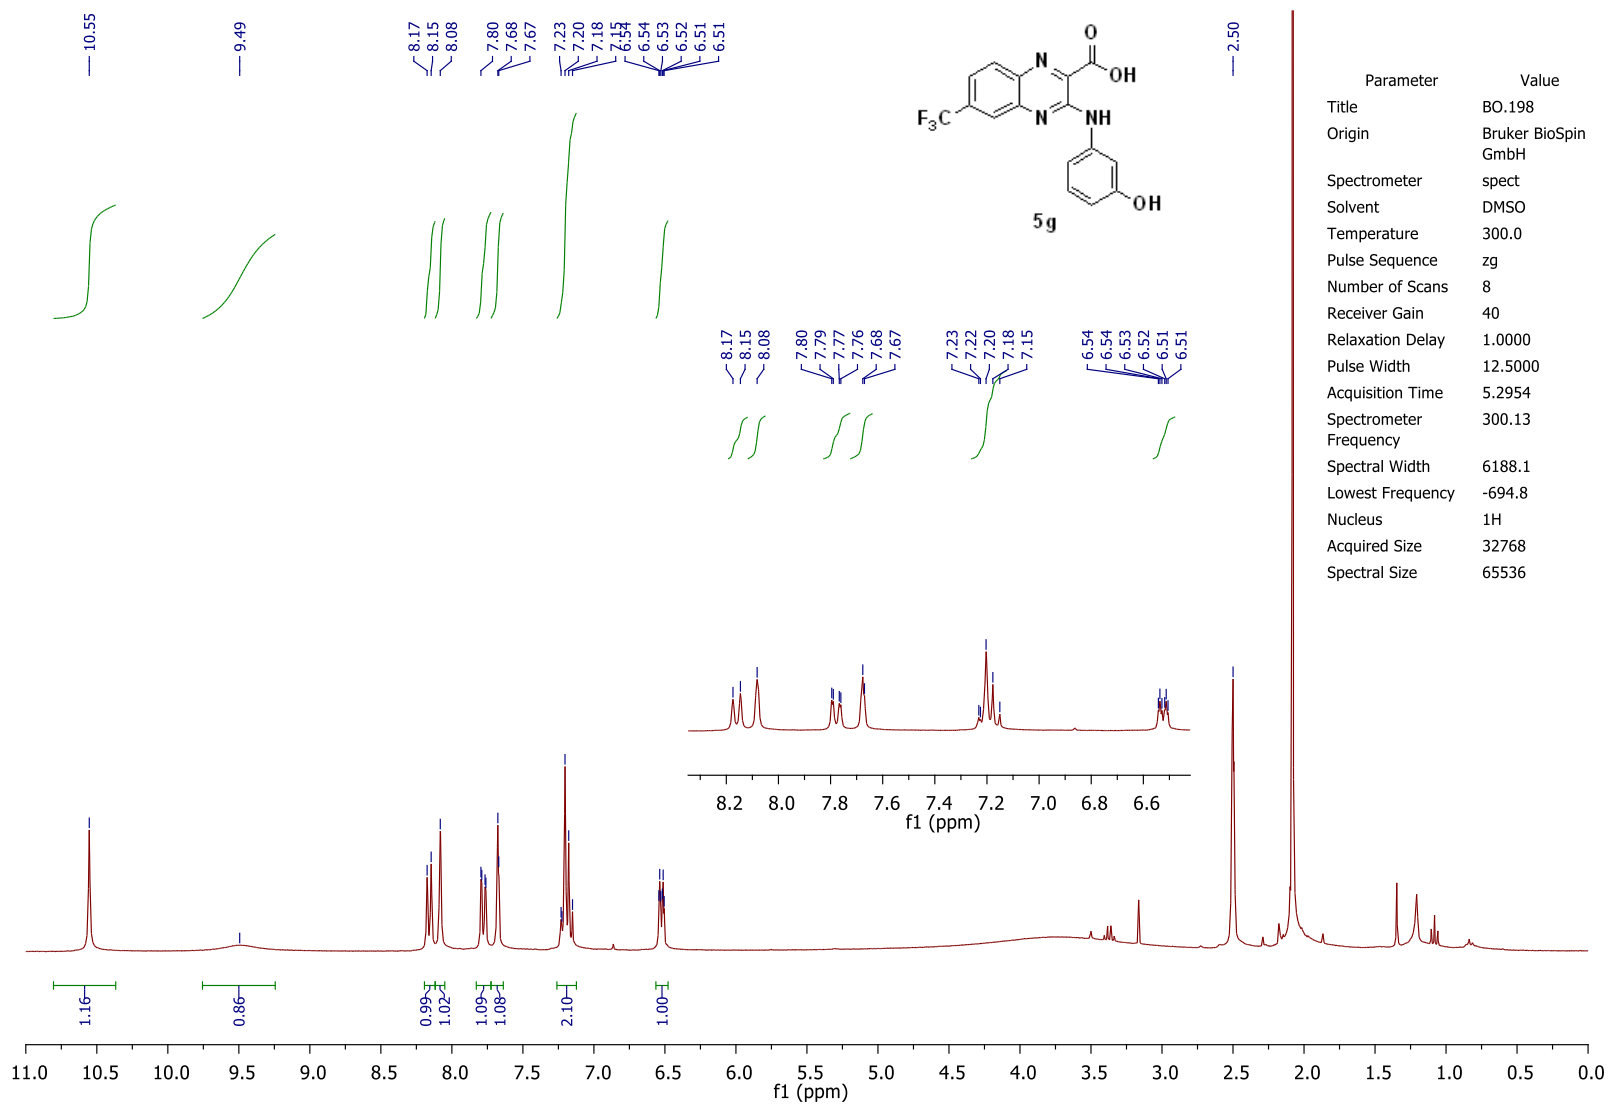

| Parameter              | Value               |
|------------------------|---------------------|
| Title                  | BO.198              |
| Origin                 | Bruker BioSpin GmbH |
| Spectrometer           | spect               |
| Solvent                | DMSO                |
| Temperature            | 300.0               |
| Pulse Sequence         | zg                  |
| Number of Scans        | 8                   |
| Receiver Gain          | 40                  |
| Relaxation Delay       | 1.0000              |
| Pulse Width            | 12.5000             |
| Acquisition Time       | 5.2954              |
| Spectrometer Frequency | 300.13              |
| Spectral Width         | 6188.1              |
| Lowest Frequency       | -694.8              |
| Nucleus                | 1H                  |
| Acquired Size          | 32768               |
| Spectral Size          | 65536               |



# <sup>13</sup>C NMR of compound 5g

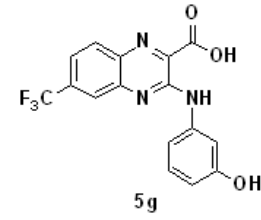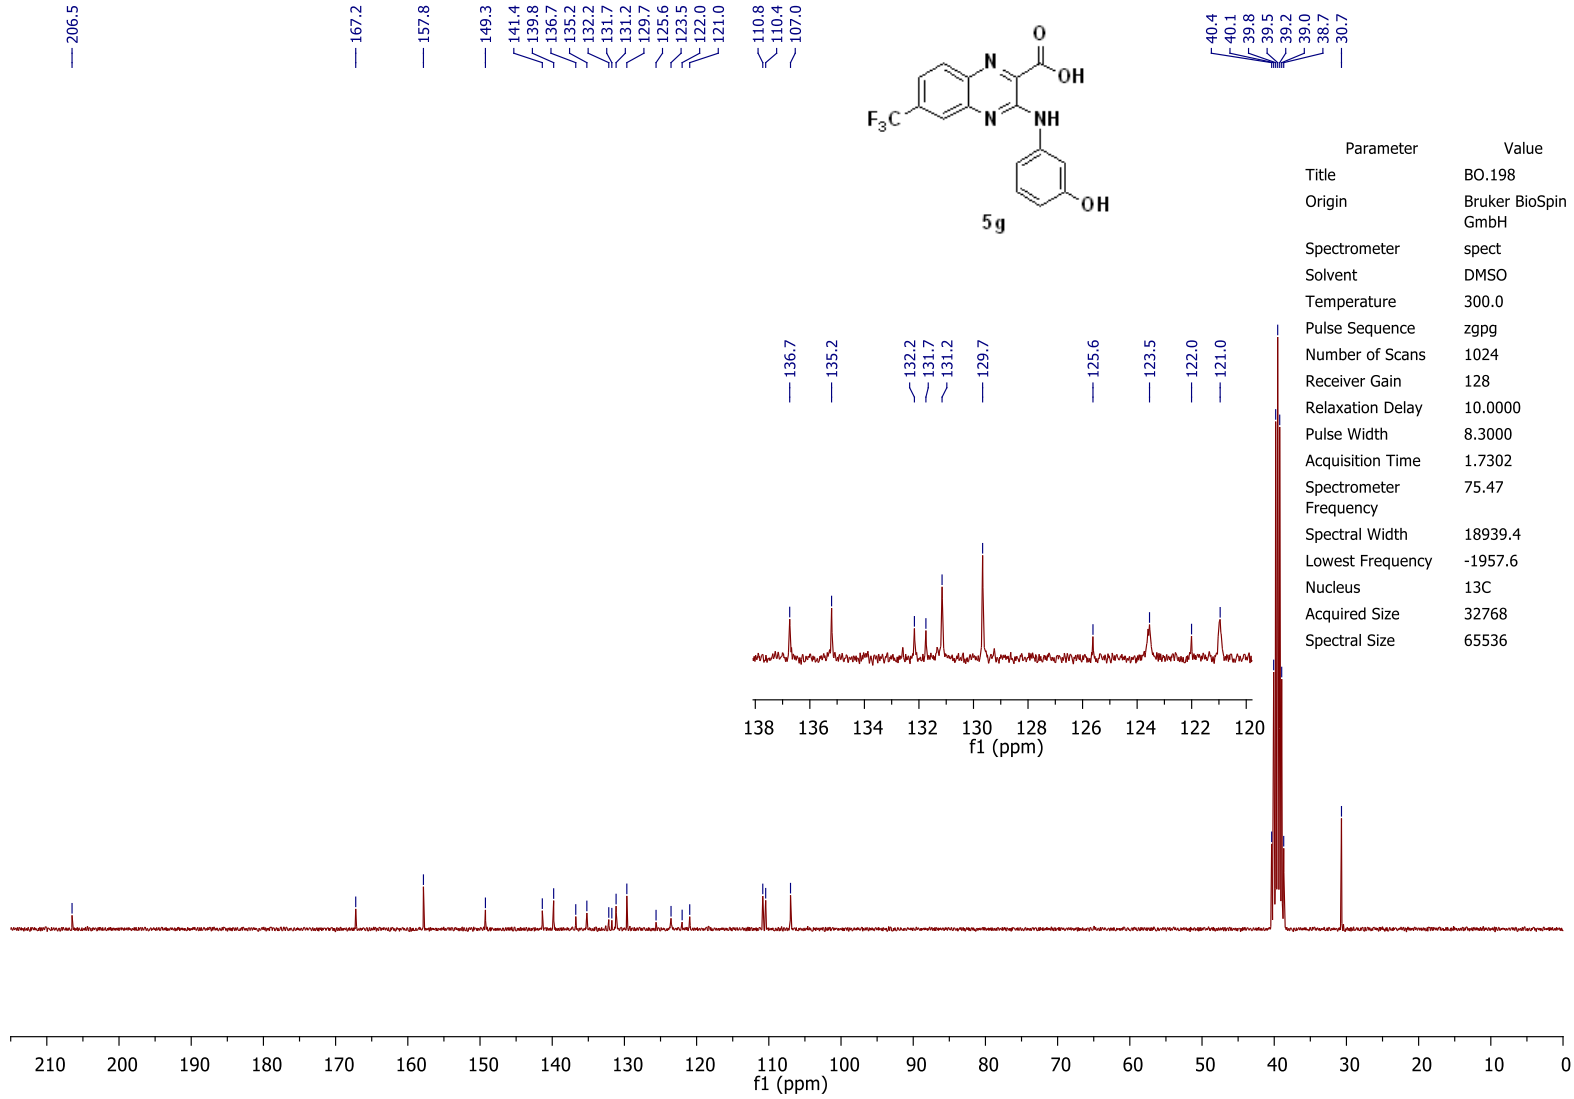

| Parameter        | Value               |
|------------------|---------------------|
| Title            | BO.198              |
| Origin           | Bruker BioSpin GmbH |
| Spectrometer     | spect               |
| Solvent          | DMSO                |
| Temperature      | 300.0               |
| Pulse Sequence   | zgpg                |
| Number of Scans  | 1024                |
| Receiver Gain    | 128                 |
| Relaxation Delay | 10.0000             |
| Pulse Width      | 8.3000              |
| Acquisition Time | 1.7302              |
| Spectrometer     | 75.47               |
| Frequency        |                     |
| Spectral Width   | 18939.4             |
| Lowest Frequency | -1957.6             |
| Nucleus          | <sup>13</sup> C     |
| Acquired Size    | 32768               |
| Spectral Size    | 65536               |

# <sup>19</sup>F NMR of compound **5g**

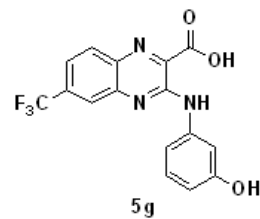

| Parameter              | Value               |
|------------------------|---------------------|
| Title                  | BO.198              |
| Origin                 | Bruker BioSpin GmbH |
| Spectrometer           | spect               |
| Solvent                | DMSO                |
| Temperature            | 300.0               |
| Pulse Sequence         | zgfhigqn            |
| Number of Scans        | 16                  |
| Receiver Gain          | 2050                |
| Relaxation Delay       | 1.0000              |
| Pulse Width            | 8.4000              |
| Acquisition Time       | 0.5768              |
| Spectrometer Frequency | 282.40              |
| Spectral Width         | 113636.4            |
| Lowest Frequency       | -85058.4            |
| Nucleus                | <sup>19</sup> F     |
| Acquired Size          | 65536               |
| Spectral Size          | 131072              |

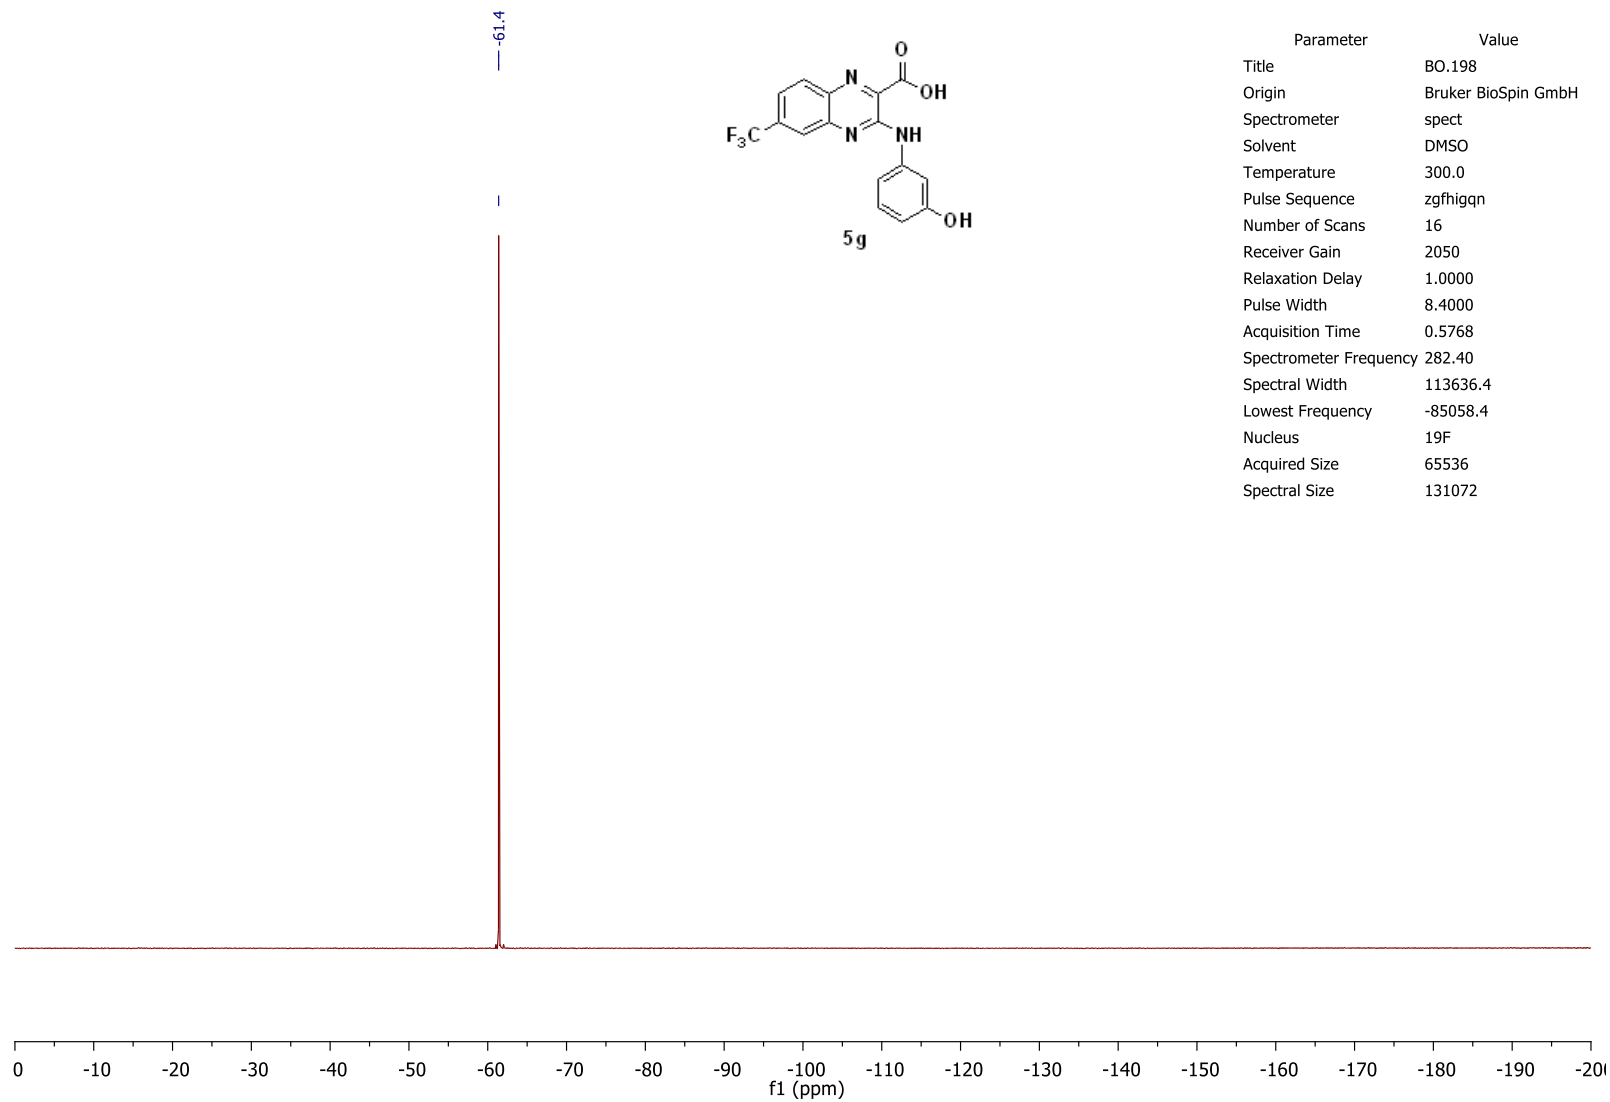

# <sup>1</sup>H NMR of compound 5h

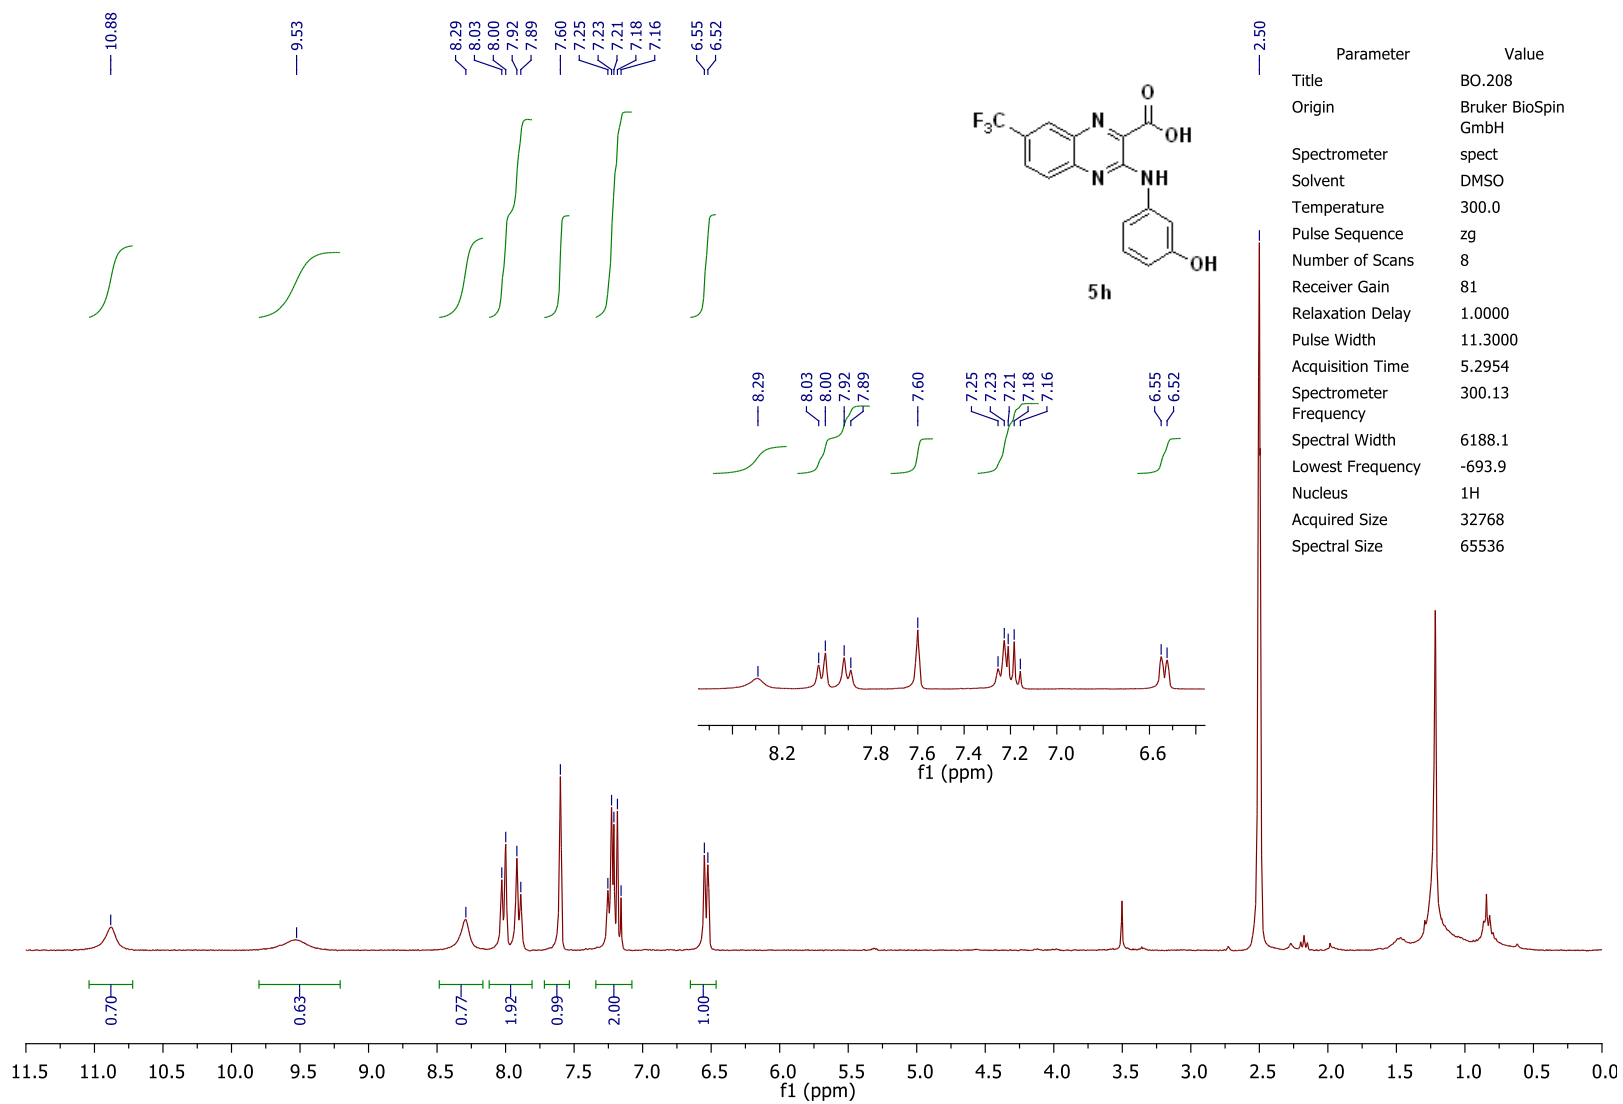

| Parameter              | Value               |
|------------------------|---------------------|
| Title                  | BO.208              |
| Origin                 | Bruker BioSpin GmbH |
| Spectrometer           | spect               |
| Solvent                | DMSO                |
| Temperature            | 300.0               |
| Pulse Sequence         | zg                  |
| Number of Scans        | 8                   |
| Receiver Gain          | 81                  |
| Relaxation Delay       | 1.0000              |
| Pulse Width            | 11.3000             |
| Acquisition Time       | 5.2954              |
| Spectrometer Frequency | 300.13              |
| Spectral Width         | 6188.1              |
| Lowest Frequency       | -693.9              |
| Nucleus                | <sup>1</sup> H      |
| Acquired Size          | 32768               |
| Spectral Size          | 65536               |

# <sup>13</sup>C NMR of compound 5h

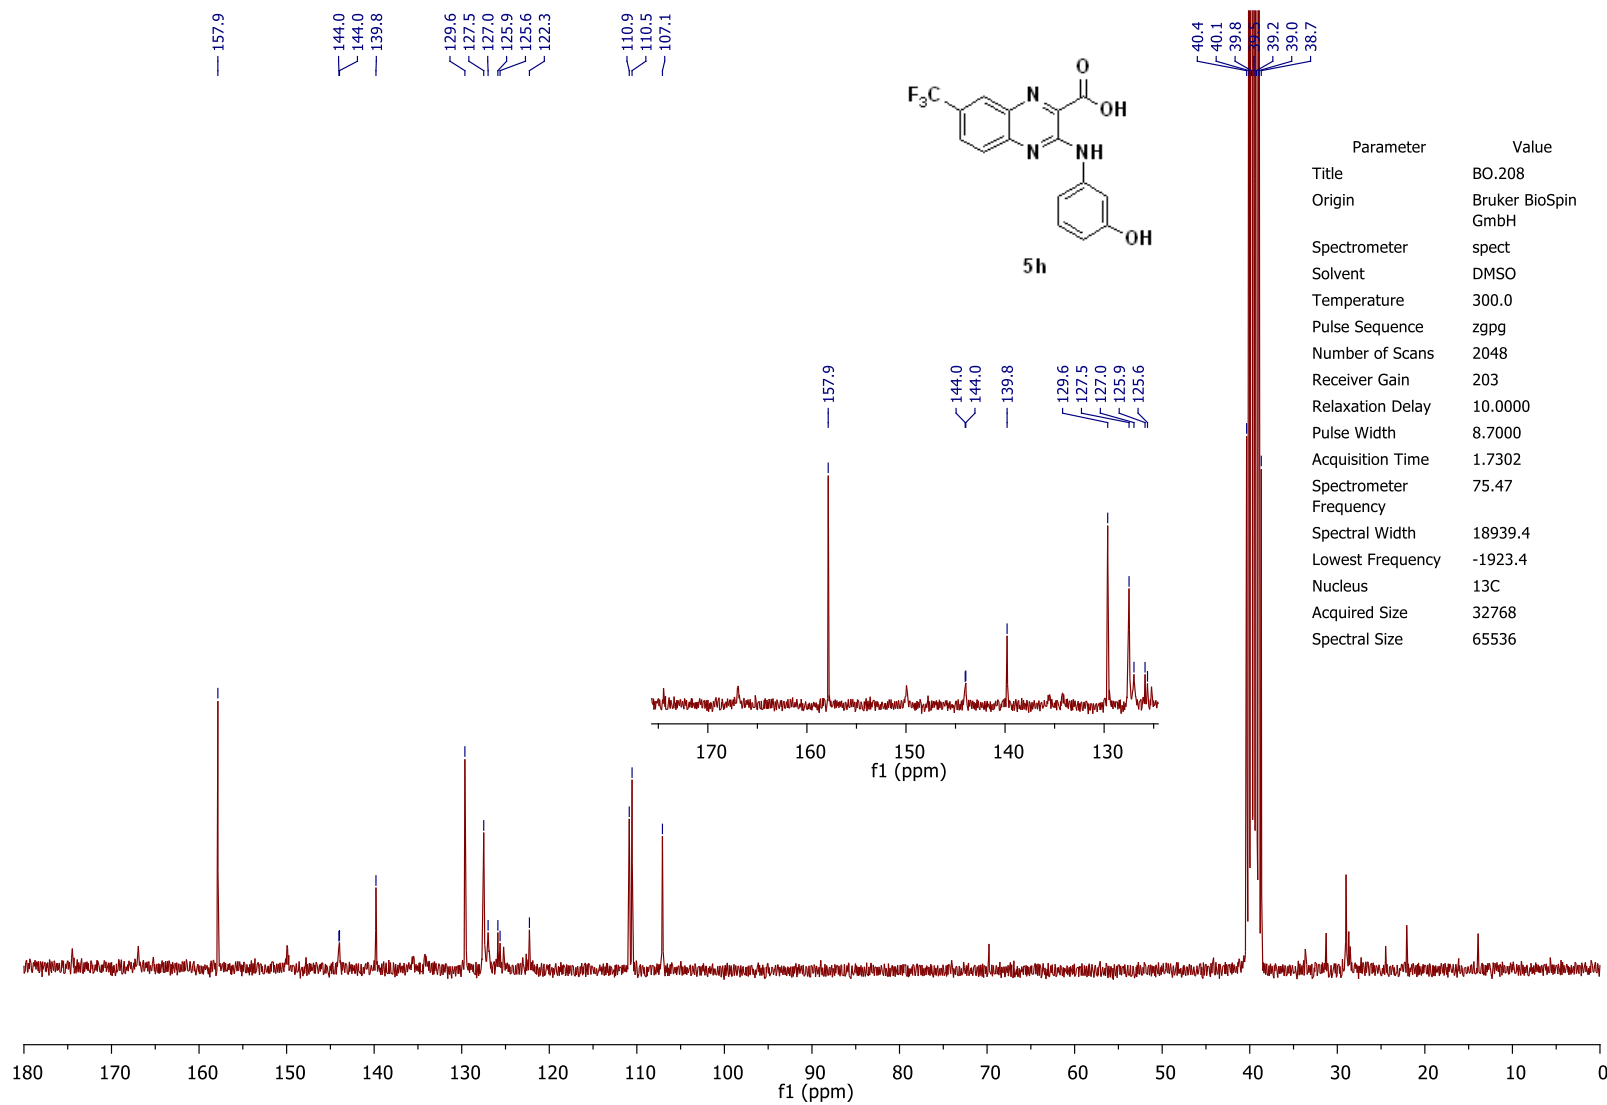

# <sup>19</sup>F NMR of compound **5h**

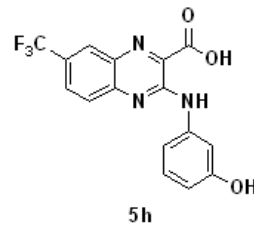

| Parameter              | Value               |
|------------------------|---------------------|
| Title                  | BO.208              |
| Origin                 | Bruker BioSpin GmbH |
| Spectrometer           | spect               |
| Solvent                | DMSO                |
| Temperature            | 300.0               |
| Pulse Sequence         | zgfhgqn             |
| Number of Scans        | 16                  |
| Receiver Gain          | 2050                |
| Relaxation Delay       | 1.0000              |
| Pulse Width            | 8.6000              |
| Acquisition Time       | 0.5768              |
| Spectrometer Frequency | 282.40              |
| Spectral Width         | 113636.4            |
| Lowest Frequency       | -85058.4            |
| Nucleus                | 19F                 |
| Acquired Size          | 65536               |
| Spectral Size          | 131072              |

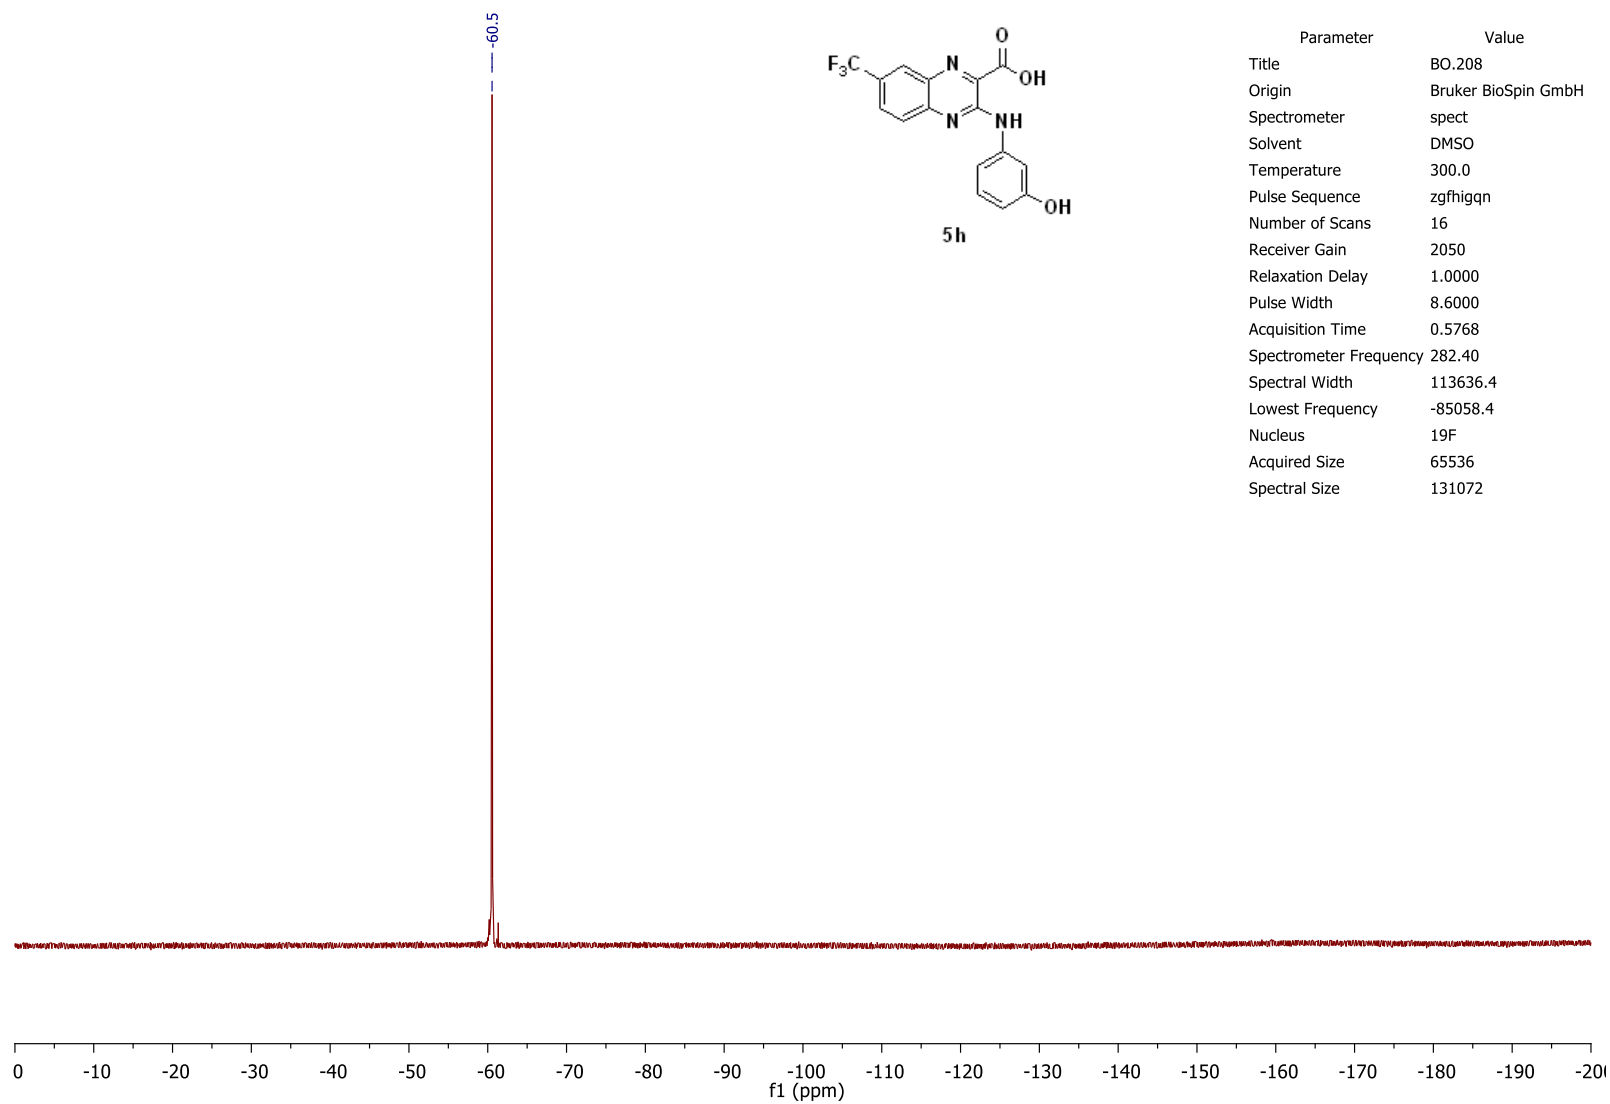

## 2. Mammalian protein kinase assays

### 2.1. Inhibition curves of compound **5c**

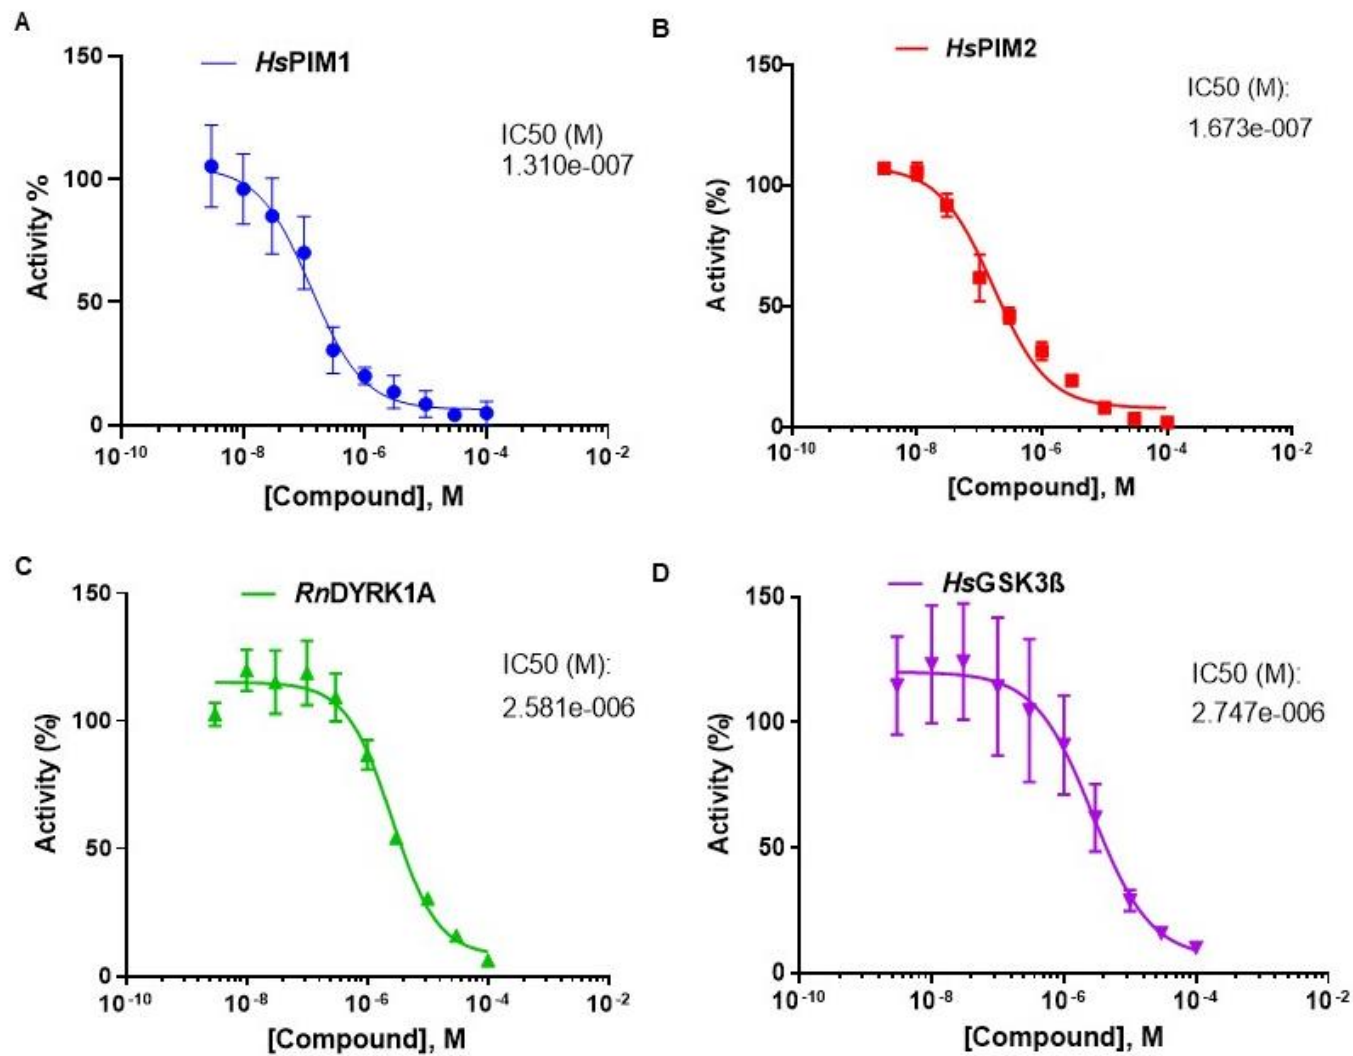

Figure S1. Inhibition curves of compound **5c** on *HsPim1* (A), *HsPim2* (B), *RnDYRK1A* (C), and *HsGSK3β* (D).

## 2.2. Inhibition curves of compound **5e**

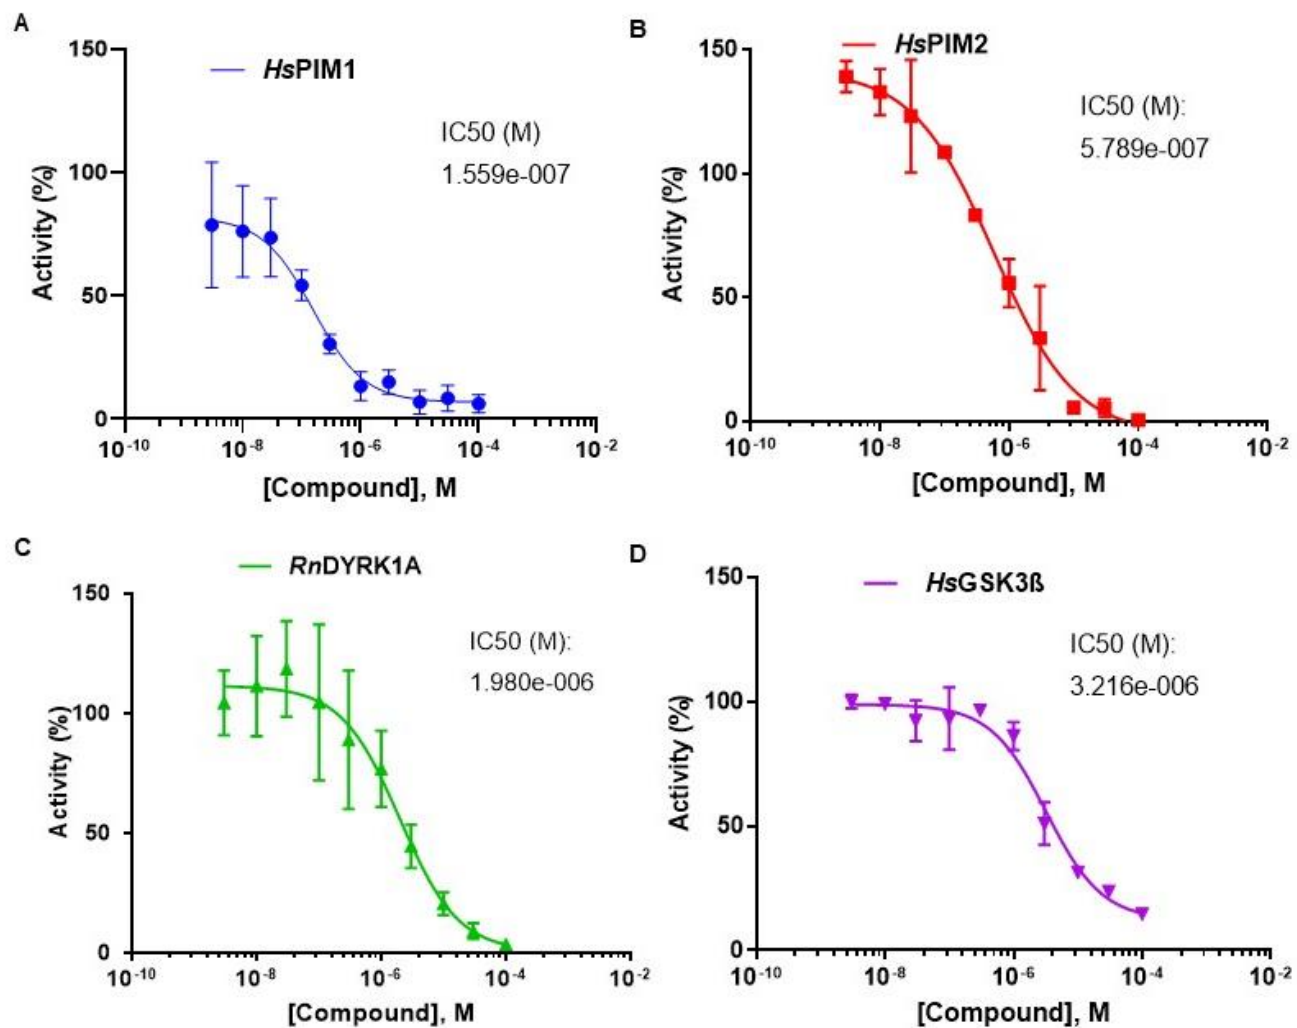

Figure S2. Inhibition curves of compound **5e** on *HsPim1* (A), *HsPim2* (B), *RnDYRK1A* (C), and *HsGSK3 $\beta$*  (D).
